# Supplementary material for: CO 2 flux over young and snow-covered Arctic sea ice in winter and spring
Source: Copernicus journal article supplement (doi:10.5194/bg-2017-521), 2018-01-08
Supplement: Supplementary file [file bg-2017-521-AC1-supplement.pdf]

## **Point-by-point responses to Review #1 and 2.**

Journal: BG

Title: CO<sub>2</sub> flux over young and snow-covered Arctic sea ice in winter and spring

Author (s): Daiki Nomura et al.

MS No.: bg-2017-521

MS Type: Research article

We thank the reviewers for their valuable comments, which have helped us to improve the manuscript.

For clarity, the authors' responses are inserted as green text.

### **Anonymous Referee #1**

Received and published: 11 February 2018

#### General comments

Nomura et al present an interesting analysis of rare data capturing CO<sub>2</sub> fluxes between sea ice and the atmosphere in Arctic winter, spring and summer as part of the N-ICE project. The methods are robust, the data are of high quality and significant value, and the arguments laid out in the paper will be of wide interest amongst the sea ice and CO<sub>2</sub> communities. However, the manuscript comes across as a little rushed in its current form, and I believe it would be improved significantly by adding more detail and explaining more clearly the key points. I recommend acceptance for publication after moderate revisions. Results are presented in summary tables. In general, I find that not enough information is presented for the reader to easily follow the arguments made in the paper, and I think some may even be misleading. For instance, based on Table 3, you argue that F<sub>ice</sub> is greater than F<sub>snow</sub> and thus make the argument that snow cover reduces flux magnitude. From the table, it appears that this is only demonstrably true for two out of the seven first-year ice stations. Two of the stations appear to have negative fluxes, but this is not addressed in the text at all, but seems to me to be quite important. These factors should be discussed in much greater detail in the text. Given the variability in your results, I think it is necessary to present the actual data, rather than just summary data. This would probably be best as figures, to accompany the summary tables. On a similar note, you have the number of measurements listed for F<sub>snow</sub> and F<sub>ff</sub> in table 3, but why not F<sub>ice</sub>. Please include this information and error estimates. It is also quite difficult in general to follow the flow through and between the different tables, for example discussion of the relationship between flux magnitude and snow thickness or water equivalent. The text needs more detail to guide the reader's understanding and some more figures would certainly help.

We are grateful for your favorable assessment. We have made changes in response to all of your recommendations and edited the text improve the readability of the text.

Now we have indicated the stations for each result (e.g., for stations FI5 and FI6) in the text. In addition, we have added following information about the negative fluxes and reason for single  $F_{ice}$  measurement in the text:

“For  $F_{ice}$ , there were negative  $CO_2$  fluxes at stations FI3 and FI4 ( $-0.6 \text{ mmol C m}^{-2} \text{ day}^{-1}$  for FI3 and  $-0.8 \text{ mmol C m}^{-2} \text{ day}^{-1}$  for FI4) (Table 3). These fluxes corresponded to low or negative  $\Delta pCO_{2 \text{ b-a}}$  as compared to that in atmosphere (Table 2 and Figure 6). Negative  $CO_2$  fluxes should correspond to negative  $\Delta pCO_{2 \text{ b-a}}$ . Therefore, the uncertainty for the calculation of carbonate chemistry may be one reason for the discrepancy in  $pCO_2$  calculation in these conditions (Brown et al., 2014).”

“During first  $CO_2$  flux measurements (about 30 minutes), ice surface temperature was stable at  $-5.8^\circ\text{C}$ , suggesting that the effect of removing snow on the variation of sea ice surface temperature was negligible within 30 minutes. The ice surface temperature decreased from  $-5.8^\circ\text{C}$  to  $-8.0^\circ\text{C}$  at 200 minutes after removal of snow. Therefore, in this paper, the data of the initial 30 minutes of  $CO_2$  flux measurement after removal of snow or frost flowers was used.”

In order to present actual data, we have added relationships between  $pCO_2$  and  $CO_2$  flux in figure showing the relationships between temperature and  $CO_2$  flux (Figure 6). In addition, we have made new figure showing the temporal variation of  $CO_2$  concentration within chamber (Figure 3).

### Specific comments

Introduction: it would be useful to include a little more information about what we know about ice-atmosphere  $CO_2$  fluxes in the context of ocean-atmosphere fluxes overall in the Arctic, and how they may change in the future. That would set the scene nicely for your statements at the end about ice-atmosphere fluxes being important in the context of a changing Arctic and the broader implications of your work. The final paragraph (line 107) could also be much stronger and punchier.

Thank you for your suggestions.

We have now added some more discussion on the results from other work in the Arctic, and to emphasize the lack of observations in the pack ice:

“In the ice covered Arctic Ocean, storm periods, with high wind speeds and open leads are important for air-to-sea  $CO_2$  fluxes (Fransson et al., 2017), due to the under-saturation of

the surface waters in CO<sub>2</sub> with respect to the atmosphere. On the other hand, the subsequent ice growth and frost flowers formation in these leads promote ice-to-air CO<sub>2</sub> fluxes in winter (e.g. Barber et al., 2014). Given the fact that Arctic sea ice is shrinking and shifting from multi-year ice to first-year ice, the area of open ocean and thinner seasonal ice is increasing. Therefore, the contribution of open ocean/thinner sea ice surface to the overall CO<sub>2</sub> fluxes of the Arctic Ocean is potentially increasing. However, due to the difficulty in acquiring observations over the winter pack ice, most of the winter CO<sub>2</sub> flux measurements were examined over the Arctic landfast ice. Therefore, there is a definite lack of information on conditions during wintertime, especially from Arctic pack ice.” in introduction.

“Rare CO<sub>2</sub> flux measurements from Arctic pack ice show that two types of ice are significant contributors to the release of CO<sub>2</sub> from ice to the atmosphere during winter and spring: young thin ice with thin layer of snow, and old (several weeks) snow covered thick ice.” in abstract.

We have changed from “Arctic sea ice” to “Arctic pack ice” in title.

To emphasize the novelty of our work, we have rewritten the final paragraph;

“The Norwegian young sea ICE (N-ICE2015) campaign in winter and spring 2015 provided opportunities to examine CO<sub>2</sub> fluxes between sea ice and atmosphere in a variety of snow and ice conditions in pack ice north of Svalbard. Formation of leads and their rapid refreezing allowed us to examine air–sea ice CO<sub>2</sub> fluxes over thin young sea ice, occasionally covered with frost flowers in addition to the snow-covered older ice that covers most of the pack ice area. The objectives of this study were to understand the effects of i) thin sea ice and frost flowers formations on the air–sea ice CO<sub>2</sub> flux in leads, ii) effect of snow-cover on the air–sea ice CO<sub>2</sub> flux over thin, young ice in the Arctic Ocean during winter and spring seasons, and iii) of the effect of the temperature difference between sea ice and atmosphere (including snow cover) on the air–sea ice CO<sub>2</sub> flux. ”.

Line 125-127: state specifically which stations you are referring to. I assume “young ice”, but this should be explicit. That might also help the descriptions of relationships between variables in the discussion, as mentioned in “general comments”.

Thank you for this suggestion. We have added the specific information for station “station Y11”. For the descriptions of relationships between variables in the discussion, please see your general comments.

Line 155-157: does this not contradict your argument that snow provides insulation? Perhaps it would help to mention timescales of T change/stability.

We agree with your comments. We have added:

“The ice surface temperature decreased from  $-5.8^{\circ}\text{C}$  to  $-8.0^{\circ}\text{C}$  at 200 minutes after removal of snow. Therefore, in this paper, the data of the initial 30 minutes of  $\text{CO}_2$  flux measurement after removal of snow or frost flowers was used.” in the text.

Line 162: I think you have air and ice surface the wrong way round.

Correct, well spotted. We have corrected.

Line 172: I think you should distinguish between stations where snow was cleared and where the sea ice surface was naturally snow-free. Given your arguments about the effects of snow cover, I assume this is significant.

We have no station where the sea ice surface was naturally snow-free (unless frost flowers are not considered as snow) (Table 1).

Line 185-187: clarify when temperature was measured.

We have added “during  $\text{CO}_2$  flux measurements (approximately 60 minutes after the onset of the  $\text{CO}_2$  flux measurement)” in the text.

Line 192-193: why was carbonate chemistry only measured at these four stations? This should be explained. It also means that table 2 looks like there is a lot of data missing; perhaps there is a better way to present these data?

At some occasions there was simply no time to collect the samples right after the flux measurements were taken, due to diverse and challenging conditions in the field. Due to the technical reason, we could not obtain the brine, except for four stations. Therefore, we have no samples for brine carbonate chemistry, except for four stations. We have added “Due to technical reason, data of snow, sea ice, and brine data were not obtained” in Table 2 caption.

Line 220: I think this should be Guildline PORTASAL salinometer Model8410A

Correct. Changed accordingly.

Line 239-240 and 239-250: this strongly suggests that the constants are not valid for your conditions. The following clearly attempts to justify its use, but it is not clear why the 40% uncertainty does not apply to your data, which would mean that none of your calculated values would have statistically significant differences. Please clarify.

For  $F_{ice}$ , there was negative  $CO_2$  flux for stations FI3 although  $\Delta pCO_{2\ b-a}$  was positive. Negative  $CO_2$  fluxes should correspond to negative  $\Delta pCO_{2\ b-a}$ . Therefore, the uncertainty for the calculation of carbonate chemistry may be one reason for the discrepancy in  $pCO_2$  calculation in these conditions (Brown et al., 2014)."

We have added "For  $F_{ice}$ , there were negative  $CO_2$  fluxes at stations FI3 and FI4 ( $-0.6\ mmol\ C\ m^{-2}\ day^{-1}$  for FI3 and  $-0.8\ mmol\ C\ m^{-2}\ day^{-1}$  for FI4) (Table 3). These fluxes corresponded to low or negative  $\Delta pCO_{2\ b-a}$  as compared to that in atmosphere (Table 2 and Figure 6). Negative  $CO_2$  fluxes should correspond to negative  $\Delta pCO_{2\ b-a}$ . Therefore, the uncertainty for the calculation of carbonate chemistry may be one reason for the discrepancy in  $pCO_2$  calculation in these conditions (Brown et al., 2014)."

Line 253-254: please give enough information for the reader to understand this calculation, without having to dig out an old reference.

We have added newer reference "Petrich and Eicken, 2010". This is a rather standard method for sea-ice, thus we would not like to use space to explain the derivation of porosity in more detail than referring to the source.

Petrich, C. and Eicken, H.: Growth, structure and properties of sea ice, in Thomas, D. N. and Dieckmann, G. S. eds., Sea Ice, 2nd ed., Oxford, Wiley-Blackwell, 23–77, 2010.

Methods: please include information about how atmospheric  $pCO_2$  was measured. It comes later as a footnote to a table, but should be included here.

We agree with your comment. We have added "The  $pCO_2$  of atmosphere was calculated from  $CO_2$  concentration (ppmv) at Ny-Ålesund, Svalbard (<http://www.esrl.noaa.gov/gmd/dv/iadv/>) taking into account saturated water vapor and atmospheric pressure during sampling day." in the text.

Line 275-276: state which stations you are referring to. This would help in general in various places in the text.

Agree. We have added “at station YI1” in the text, and also in other locations in the text to make the reasoning easier to follow.

Line 279-280: I think it would help to demonstrate this point if you plotted air temperature on figure 4, so that the relation is clear.

We have added air temperature on Figure 5a.

Line 285-286: can you highlight on figure 4b which measurements are from frost flowers?

We have changed the range of salinity in Figure 5b and added arrow to indicate frost flower data.

Line 292 and table 2: you present data from the top 20 cm, which presumably means your top two 10cm slices. Why do you only present the top 20cm when most cores are longer? Would it be better to present profiles to show downcore variability? If not, please justify presenting only the top 20 cm and provide error/uncertainty estimates from averaging of values from two core slices.

We have used average temperature for top 20 cm sea ice because the environmental information at the top of sea ice were important parameters regulating the CO<sub>2</sub> flux at sea ice surface. Unlikely the conditions deeper down in the ice will be important for such a short period of measurement given fluxes in the ice would be diffusion driven. We have added the range of temperature at top 20 cm sea ice in Table 2.

Line 322: “except for station OI1”. Should this also say YI1 as it does in section 3.2?

Correct. We have added YI1 in the text.

Line 324: “..and in cases the thick insulating snow cover”. Does not make sense. In certain cases? In cases where. . .?

We agree with your comments. We have changed to “, except for station OI1 (Tables 1 and 2)”.

Line 355-358: this statement is only true for FI5, FI6 and YI1. Same comment for line 372-373.

Correct. We have added “, especially for stations FI5 and FI6”.

Line 357: Where you state that one value or group of values is lower than another, please provide relevant statistical details (e.g. t-test, z-test etc.)

We agree with your comments. We have deleted “mean” and added “, especially for stations FI5, FI6, and YII.” in the text.

Line 372-382: This paragraph is an example of where a lot more detail is required to demonstrate your points. Flux direction, magnitude and relationships between variables all need to be discussed for the different stations.

We have added information of flux direction, magnitude and relationships between variables ( $F_{\text{snow}}/F_{\text{ice}}$  ratio and water equivalent) all need to be discussed for the different stations. New paragraph is:

“The magnitude of positive  $F_{\text{snow}}$  is less than  $F_{\text{ice}}$  for stations FI5 and FI6 (Table 3) indicating that the potential  $\text{CO}_2$  flux from sea ice decreased due to the presence of snow. Previous studies have shown that snow accumulation over sea ice effectively impede  $\text{CO}_2$  exchange (Nomura et al., 2013; Brown et al., 2015). Nomura et al. (2013) reported that 50–90% of the potential  $\text{CO}_2$  flux was reduced due to the presence of snow/superimposed-ice at the water equivalent of 57–400  $\text{kg m}^{-2}$ , indicating that the snow properties are an important factor that controls the  $\text{CO}_2$  exchange through a snowpack. Comparisons between stations FI5 and FI6 for  $F_{\text{snow}}/F_{\text{ice}}$  ratio (0.2 for FI5 and 0.0 for FI6) and water equivalent (11  $\text{kg m}^{-2}$  for FI5 and 127  $\text{kg m}^{-2}$  for FI6) indicate that the potential  $\text{CO}_2$  flux is reduced (80% for FI5 and 98% for FI6 of the potential  $\text{CO}_2$  flux) with increasing water equivalent. Although the magnitude of the potential  $\text{CO}_2$  flux through the sea ice surface decreased by the presence of snow for stations FI5 and FI6 (Table 3), the snow surface still presents a  $\text{CO}_2$  source to the atmosphere for low snow density and shallow depth conditions (e.g., +0.6  $\text{mmol C m}^{-2} \text{ day}^{-1}$  for FI5).”

Line 380: reference to table 3. You need to be specific about what you are referring to that shows that flux is reduced by the presence of snow. If you compare FI5 and FI6, FI6 shows a much greater potential flux but actually has a greater snow thickness and water equivalent than FI5. This should be incorporated into your comparisons.

We agree with your comments. We have added “for stations FI5 and FI6”.

Line 396-399: How will footprint size make such a big difference? If it arises from small-scale heterogeneity in time and/or space, this should be stated. Are there any other reasons worthy of mention?

To clarify we have added the following “The eddy covariance method reflects a flux integrated over a large area, that can contain several different surface types. Therefore, eddy-covariance appears to be more useful for understanding fluxes at large special and temporal scales. On the other hand, the chamber method reflects the area where chamber was covered, and it is useful for understanding the relationship between fluxes and ice surface conditions on smaller scales. The different spatial scales of the two methods may be therefore one reason for the discrepancy in CO<sub>2</sub> flux measurements.”

Line 401-406: your fluxes are at the lower end of positive values – this should be stated, and elaborated on to discuss negative fluxes as well as positive ones (as per my earlier comment).

We have added “of positive values”.

We have added “For  $F_{ice}$ , there were negative CO<sub>2</sub> fluxes at stations FI3 and FI4 ( $-0.6 \text{ mmol C m}^{-2} \text{ day}^{-1}$  for FI3 and  $-0.8 \text{ mmol C m}^{-2} \text{ day}^{-1}$  for FI4) (Table 3). These fluxes corresponded to low or negative  $\Delta p\text{CO}_2_{b-a}$  as compared to that in atmosphere (Table 2 and Figure 6). Negative CO<sub>2</sub> fluxes should correspond to negative  $\Delta p\text{CO}_2_{b-a}$ . Therefore, the uncertainty for the calculation of carbonate chemistry may be one reason for the discrepancy in  $p\text{CO}_2$  calculation in these conditions (Brown et al., 2014).” in the text.

Line 406: should be “up to +11.8” or somehow make it clear that this is the maximum value.

We agree with your comments. We have added “up to”.

Line 432-461: this section emphasises the importance of the temperature gradient in modifying fluxes and gives the impression that this is the most important variable. In fact, the correlation between temperature difference and flux is less strong than the correlation with  $p\text{CO}_2$  difference between the ice and atmosphere (given in line 310). This would be much clearer and more reflective of what the data show, if both variables were discussed here in terms of their relative importance overall and such a strong emphasis on temperature dampened. I also think it would help to add to figure 5 a panel which plots  $p\text{CO}_2$  difference vs. flux, to show the two relationships directly.

We agree with your comments. We indicated that both variables ( $\Delta p\text{CO}_2_{b-a}$  and temperature difference) affect CO<sub>2</sub> flux. For example, we compared our data (e.g. for



station FI6) with a previous study (Nomura et al., 2006) for each variable. The  $\Delta p\text{CO}_2_{\text{b-a}}$  was similar (297  $\mu\text{atm}$  for Nomura et al., 2006 and 293  $\mu\text{atm}$  for FI6) while temperature difference was not same (4.5°C for Nomura et al., 2006 and 20.2°C for FI6). In addition, the  $\text{CO}_2$  flux was +0.7  $\text{mmol C m}^{-2} \text{ day}^{-1}$  for Nomura et al., 2006 and +11.8  $\text{mmol C m}^{-2} \text{ day}^{-1}$  for FI6. These results suggested that temperature difference enhanced the  $\text{CO}_2$  flux between sea ice and atmosphere at the same  $\Delta p\text{CO}_2_{\text{b-a}}$ . On the other hand, the variation of  $\Delta p\text{CO}_2_{\text{b-a}}$  would be modified  $\text{CO}_2$  flux as shown in equation ( $F_{\text{CO}_2} = r_b k \alpha \Delta p\text{CO}_2_{\text{b-a}}$ ). For the relationships between  $\text{CO}_2$  flux and  $\Delta p\text{CO}_2_{\text{b-a}}$  as indicated in section 3.4,  $\text{CO}_2$  flux values included the effect of the temperature difference. Therefore, it is difficult to divide the relative importance for  $\Delta p\text{CO}_2_{\text{b-a}}$  and temperature difference.

We have added relationships between  $p\text{CO}_2$  and  $\text{CO}_2$  flux in figure showing the relationships between temperature and  $\text{CO}_2$  flux (Figure 6).

Line 458-459: “for young sea ice likely the frost flower conditions”. Does not make sense.

We agree with your comments. We have changed to “for young sea ice with frost flowers (e.g. station Y11)”.

Line 468-473: from the data presented in table 3, not all stations can be described as showing  $\text{CO}_2$  sources. Some clearly show sink behaviour (negative fluxes), and for a number of others, the uncertainty on flux estimates cannot confidently be described as a source, e.g. when flux =  $0.1 \pm 0.1$ . This is particularly the case given that you state the detection limit as 0.1. This also needs to be considered in your discussion.

We agree with your comments. We have added:

“For  $F_{\text{ice}}$ , there were negative  $\text{CO}_2$  fluxes at stations FI3 and FI4 ( $-0.6 \text{ mmol C m}^{-2} \text{ day}^{-1}$  for FI3 and  $-0.8 \text{ mmol C m}^{-2} \text{ day}^{-1}$  for FI4) (Table 3). These fluxes corresponded to low or negative  $\Delta p\text{CO}_2_{\text{b-a}}$  as compared to that in atmosphere (Table 2 and Figure 6). Negative  $\text{CO}_2$  fluxes should correspond to negative  $\Delta p\text{CO}_2_{\text{b-a}}$ . Therefore, the uncertainty for the calculation of carbonate chemistry may be one reason for the discrepancy in  $p\text{CO}_2$  calculation in these conditions (Brown et al., 2014).”

Line 476-477: This should not be presented as a conclusion.

We agree with your comments. We have deleted from the text.

Line 485-488: I think you undersell the importance of your work here, and you could make more compelling statements about the role of sea ice in  $\text{CO}_2$  fluxes in a changing Arctic.

We agree with your comments. We have deleted.

Figure 3. should this cite Hudson et al., 2015?

We agree with your comments. We have added “Hudson et al., 2015” in the Figure 3 caption.

Table 2. Consider adding an extra column for  $\Delta p\text{CO}_2$  (air-sea difference) to aid understanding.

Added as suggested.

Table 3. The key thing that jumps out for me is that natural flux is much higher for frost flowers than snow. I would have thought that’s worth highlighting in your discussion.

We have added “and  $F_{ff}$  was higher than  $F_{snow}$ , except for station F11”. We also indicated “Frost flowers are known to promote gas flux, such as  $\text{CO}_2$ , from the sea ice to the atmosphere (Geilfus et al., 2013; Barber et al., 2014; Fransson et al., 2015).”

Technical corrections

In general, the manuscript is well-written, the technical language is appropriate, and the standard of English is good. However, there are a couple of points to check throughout the text: use of the definite/indefinite article; singular/plural nouns and their following verbs e.g. frost flowers, was/were.

Thank you. During revisions we have tried to have our native-English co authors read through the text to improve the flow.

Line 84: should be transport by molecular diffusion

Changed accordingly.

Line 218: remove hyphens

Changed accordingly.

Line 377: I think 0.0 is a mistake.

$F_{\text{snow}}/F_{\text{ice}}$  ratio for FI6 was 0.02. Therefore, we indicated it as “0.0”.

Table 3: brackets in the top line are confusing.

We have changed.

## **Anonymous Referee #2**

Received and published: 16 February 2018

The manuscript makes interesting observations of CO<sub>2</sub> flux through sea ice, but requires extensive improvement. It was never articulated how this study is novel. I feel that it perhaps may be novel, but it is unclear how in its current form. Major revisions are needed before this manuscript can be considered publishable. The abstract is borderline uninformative. What are characteristic fluxes? Are these important? Of course CO<sub>2</sub> can flux through sea ice, but it's hard for the reader to gauge exactly how trivial this is without values in the abstract to justify reading the rest of the paper. The sentence beginning line 61 is a reference dump. What did these studies find and how does it build to the importance (or lack thereof) of the present manuscript?

We are grateful for your assessment of our work. We have now added some more discussion on the results from other work in the Arctic, and to emphasize the lack of observations in the pack ice:

We have added “In the ice covered Arctic Ocean, storm periods, with high wind speeds and open leads are important for air-to-sea CO<sub>2</sub> fluxes (Fransson et al., 2017), due to the under-saturation of the surface waters in CO<sub>2</sub> with respect to the atmosphere. On the other hand, the subsequent ice growth and frost flowers formation in these leads promote ice-to-air CO<sub>2</sub> fluxes in winter (e.g. Barber et al., 2014). Given the fact that Arctic sea ice is shrinking and shifting from multi-year ice to first-year ice, the area of open ocean and thinner seasonal ice is increasing. Therefore, the contribution of open ocean/thinner sea ice surface to the overall CO<sub>2</sub> fluxes of the Arctic Ocean is potentially increasing. However, due to the difficulty in acquiring observations over the winter pack ice, most of the winter CO<sub>2</sub> flux measurements were examined over the Arctic landfast ice. Therefore, there is a definite lack of information on conditions during wintertime, especially from Arctic pack ice.” in introduction.

We have changed the final paragraph of the introduction “The Norwegian young sea ICE (N-ICE2015) campaign in winter and spring 2015 provided opportunities to examine CO<sub>2</sub> fluxes between sea ice and atmosphere in a variety of snow and ice conditions in pack ice

north of Svalbard. Formation of leads and their rapid refreezing allowed us to examine air–sea ice CO<sub>2</sub> fluxes over thin young sea ice, occasionally covered with frost flowers in addition to the snow-covered older ice that covers most of the pack ice area. The objectives of this study were to understand the effects of i) thin sea ice and frost flowers formations on the air–sea ice CO<sub>2</sub> flux in leads, ii) effect of snow-cover on the air–sea ice CO<sub>2</sub> flux over thin, young ice in the Arctic Ocean during winter and spring seasons, and iii) of the effect of the temperature difference between sea ice and atmosphere (including snow cover) on the air–sea ice CO<sub>2</sub> flux.” in introduction.

In the abstract, we have added CO<sub>2</sub> flux values “We found that young sea ice formed in leads, without snow cover, is the most effective in terms of CO<sub>2</sub> flux (+1.0 ± 0.6 mmol C m<sup>-2</sup> day<sup>-1</sup>) since the fluxes are an order of magnitude higher than for snow-covered older ice (+0.2 ± 0.2 mmol C m<sup>-2</sup> day<sup>-1</sup>).” We have added “Rare CO<sub>2</sub> flux measurements from Arctic pack ice show that two types of ice are significant contributors to the release of CO<sub>2</sub> from ice to the atmosphere during winter and spring: young thin ice with thin layer of snow, and old (several weeks) snow covered thick ice.”.

68: Sea-ice CO<sub>2</sub> fluxes

Changed accordingly.

On line 81, please see Massman et al. (1995) as the fundamental reference on this topic ([https://www.fs.fed.us/rm/pubs\\_exp\\_for/glees/exp\\_for\\_glees\\_1995\\_massman.pdf](https://www.fs.fed.us/rm/pubs_exp_for/glees/exp_for_glees_1995_massman.pdf)).

We agree with your comments. We have checked and added.

Somewhat harsh transition before the last paragraph of the introduction. Please state more clearly how the background materials presented tie directly to the proposed study and therefore what makes the present study novel. Material in section 4.3 could help. (note that there are also many reference dumps here. Please explain what the studies found; it is your job to make the reader’s job easy (<https://www.sesync.org/blog/the-writers-job>).

We agree with your comment. Please see our response to your first comment “The manuscript makes interesting observations of CO<sub>2</sub> flux .....and how does it build to the importance (or lack thereof) of the present manuscript?”.

on line 132, how was it ensured that placement of chambers did not perturb the pressure gradients in the snow? Creating pressure gradients can push CO<sub>2</sub> out (or pull it in).

We agree with your comment. First, the chamber collar was inserted 5 cm into the snow and 1 cm into ice at frost flowers site to avoid air leaks between inside and outside of chamber. Then, chambers were installed over the collar. Therefore, placement of chamber on collar would avoid creation of pressure gradient. In addition, LI-COR 8100-104 chambers used in this study have carefully designed pressure vents to prevent pressure gradients and wind incursion from outside the chamber (Xu L., et al. 2006). Xu L., et al. 2006. On maintaining pressure equilibrium between a soil CO<sub>2</sub> flux chamber and the ambient air. Journal of Geophysical Research. 111, D08S10, doi:10.1029/2005JD006435.

on 144, please see Bain et al. (2005) as a relevant reference for wind-induced effects (<https://www.sciencedirect.com/science/article/pii/S0168192305001164>)

Thank you. We have checked and added.

Frost flowers are first introduced in the paragraph beginning on line 146. One assumes that these are somehow important for CO<sub>2</sub> flux? The notion was not previously introduced. (see line 360. This belongs in the intro). I agree with Reviewer 1 that the manuscript was prepared somewhat hastily.

We have added “In addition, Fransson et al. (2015) indicated that frost flowers promote CO<sub>2</sub> flux from the ice to the atmosphere.” in the introduction. We also mentioned “F<sub>ff</sub>” in the method section.

153: what is station FI6? Abbreviations are introduced before they are explained. It would help to explain the geography of the site before the measurements, also to ensure that measurements were made with a random design in mind.

We have changed “Air–sea ice CO<sub>2</sub> flux measurements were done over young ice (YI stations), first-year ice (FI stations), and old ice (multi-year ice) (OI station).”. We also referred to the table where all the stations are listed.

Extensive English improvement is needed in section 2.3

We agree with your comment. The native English-speaking co-author has now edited section 2.3 and gone through the text.

On line 266, what does 'near-constant 0 C' mean?

We agree with your comment. We have changed to “near 0”.

60.0 cm sounds rather specific for a measurement of snow which I assume has frequent small undulations, either at the snow surface or snow-ice interface in section 3.4, per day is not a SI unit, and diurnal patterns in the flux may make it difficult to scale from the native measurements (in the SI units of seconds) to the full day.

Snow is variable, but given that these are spot measurement we report to snow depth at site of measurement, as it is the local conditions that will affect the conditions at the measurement site ice surface. We would like to keep unit used in this study because sea ice CO<sub>2</sub> flux community used in the previous studies and it would be convenient for comparisons.

416: the abbreviation F was introduced far earlier.

Correct, (F) deleted from the sentence.

432: this is actually interesting. By focusing on the challenge of estimating gas transfer velocity, the manuscript has some novel features. These might be initial hypotheses for future work if causality can't be determined, but the mechanisms of sea ice/atmosphere gas exchange make for a more interesting analysis even if remaining questions are left.

We agree with your comments. We estimated gas transfer velocity for station FI6 and tank experiment. The gas transfer velocity for  $F_{ice}$  at station FI6 is higher than that of tank experiment examined in Nomura et al. (2006) even with very similar  $\Delta pCO_{2\ b-a}$  and brine volume fraction. Therefore, our results clearly indicated that temperature difference between sea ice surface and atmosphere would produce an unstable air density gradient and upward transport of air, thereby increasing gas transfer velocity. The comparison of the gas transfer velocity would be useful to evaluate the temperature effect on the air-sea ice CO<sub>2</sub> flux.

Figure 4: avoid simultaneous use of red and green in a figure.

We agree with your comments. We have changed.

1 | **CO<sub>2</sub> flux over young and snow-covered Arctic pack ice in**  
2 | **winter and spring**

Nomura Daiki 2018/3/24 0:22

削除: sea

3 |  
4 | Daiki Nomura<sup>1, 2, 3\*</sup>, Mats A. Granskog<sup>4</sup>, Agneta Fransson<sup>4</sup>, Melissa Chierici<sup>5, 6</sup>, Anna  
5 | Silyakova<sup>7</sup>, Kay I. Ohshima<sup>1, 3</sup>, Lana Cohen<sup>4</sup>, Bruno Delille<sup>8</sup>, Stephen R. Hudson<sup>4</sup>, and  
6 | Gerhard S. Dieckmann<sup>9</sup>

7 |  
8 | 1 Institute of Low Temperature Science, Hokkaido University, Kita-19, Nishi-8, Kita-  
9 | ku, Sapporo, Hokkaido 060-0819, Japan.

10 |  
11 | 2 Faculty of Fisheries Sciences, Hokkaido University, 3-1-1, Minato-cho, Hakodate,  
12 | Hokkaido 041-8611, Japan.

13 |  
14 | 3 Arctic Research Center, Hokkaido University, Kita-21, Nishi-11, Kita-ku, Sapporo,  
15 | Hokkaido 001-0021, Japan.

16 |  
17 | 4 Norwegian Polar Institute, Fram Centre, NO-9296 Tromsø, Norway.

18 |  
19 | 5 Institute of Marine Research, NO-9294, Tromsø, Norway.

20 |  
21 | 6 FRAM-High North Research Centre for Climate and the Environment, Tromsø,  
22 | Norway.

23 |  
24 | 7 CAGE, Centre for Arctic Gas Hydrate, Environment and Climate, Tromsø, Norway.

25 |  
26 | 8 Unité d'Océanographie Chimique, [Freshwater and Oceanic science Unit of research](#),  
27 | Université de Liège, Liège, Belgium.

28 |  
29 | 9 Alfred Wegener Institute for Polar and Marine Research, Bremerhaven, Germany.

33 | \*Corresponding author: Daiki Nomura, e-mail: daiki.nomura@fish.hokudai.ac.jp,  
34 | Faculty of Fisheries Sciences, Hokkaido University, 3-1-1, Minato-cho, Hakodate,  
35 | Hokkaido 041-8611, Japan.  
36 |  
37 |  
38 |



39 **Abstract**

40  
41  
42  
43  
44  
45  
46  
47  
48  
49  
50  
51  
52  
53  
54  
55  
56  
57  
58  
59  
60  
61  
62  
63  
64  
65  
66  
67  
68  
69  
70

Rare CO<sub>2</sub> flux measurements from Arctic pack ice show that two types of ice are significant contributors to the release of CO<sub>2</sub> from ice to the atmosphere during winter and spring: young thin ice with thin layer of snow, and old (several weeks) snow covered thick ice. Young thin sea ice is characterized by high salinity and then porosity and thin layer of snow. Snow covered thick ice can remain relatively warm (>-7.5°C) due to a thick insulating snow cover despite air temperatures were as low as -40°C. Brine volume fractions of these two ice type are therefore high enough to provide favorable conditions for gas exchange between sea ice and the atmosphere even in mid-winter. Although the potential CO<sub>2</sub> flux from sea ice decreased due to the presence of the snow, the snow surface is still a CO<sub>2</sub> source to the atmosphere for low snow density and thin snow conditions. We found that young sea ice formed in leads, without snow cover, is the most effective in terms of CO<sub>2</sub> flux (+1.0 ± 0.6 mmol C m<sup>-2</sup> day<sup>-1</sup>) since the fluxes are an order of magnitude higher than for snow-covered older ice (+0.2 ± 0.2 mmol C m<sup>-2</sup> day<sup>-1</sup>).

1 Introduction

Arctic sea ice is changing dramatically, with rapid declines in summer sea ice extent and a shift towards younger and thinner first-year ice rather than thick multi-year ice (e.g., Stroeve et al., 2012; Meier et al., 2014; Lindsay and Schweiger, 2015). Although the effects of sea ice formation and melting on biogeochemical cycles in the ocean have previously been discussed (e.g., Vancoppenolle et al., 2013), the effects of sea ice freezing and melting on the carbon dioxide (CO<sub>2</sub>) exchange with the atmosphere are still large unknowns (Parmentier et al., 2013).

Recent CO<sub>2</sub> flux measurements on sea ice indicate that sea ice is an active component in gas exchange between ocean and atmosphere (Nomura et al., 2013; Geilfus et al., 2013; 2014; Delille et al., 2014; Brown et al., 2015; Kotovitch et al., 2016). The sea-ice CO<sub>2</sub>

- Mats Granskog 2018/3/23 6:46  
削除: We
- Bruno Delille 2018/3/27 1:35  
削除: observations of chamber-type ... [1]
- Lana Cohen 2018/3/19 10:07  
削除: thus ...rosity and thin layer of s ... [2]
- Bruno Delille 2018/3/27 1:44  
削除: The surface of the thicker sea ice
- Lana Cohen 2018/3/19 10:08  
削除: was
- Bruno Delille 2018/3/27 1:42  
削除: ed
- Lana Cohen 2018/3/19 10:08  
削除: ... due to a thick insulating snow ... [3]
- Bruno Delille 2018/3/27 1:45  
削除: During these conditions, b...Br ... [4]
- Lana Cohen 2018/3/19 10:09  
削除: Especially
- Bruno Delille 2018/3/27 1:50  
削除: ind ... and that young sea ice for ... [5]

Nomura Daiki 2018/3/22 16:11  
削除: However, due to the difficulty in acquiring observations during winter, there is a definite lack of information on conditions during wintertime. ... [6]

121 fluxes depend on (a) the difference in the partial pressure of CO<sub>2</sub> (pCO<sub>2</sub>) between the  
122 sea ice surface and air, (b) brine volume fraction at the ice-snow interface, (c) ice  
123 surface condition including the snow deposited on ice, and (d) wind-driven pressure  
124 pumping through the snow. For (a), it is known that the air-sea ice CO<sub>2</sub> flux is driven  
125 by the differences in pCO<sub>2</sub> between the sea ice surface and atmosphere (e.g. Delille et  
126 al., 2014; Geilfus et al., 2014). The brine pCO<sub>2</sub> changes due to processes within the sea  
127 ice, such as thermodynamic process (e.g., Delille et al., 2014), biological activity (e.g.,  
128 Delille et al., 2007; Fransson et al., 2013; Rysgaard et al., 2013), and calcium carbonate  
129 (CaCO<sub>3</sub>; ikaite) formation and dissolution (e.g., Papadimitriou et al., 2012). When the  
130 pCO<sub>2</sub> in the brine is higher than that of the air pCO<sub>2</sub>, brine has the potential to release  
131 CO<sub>2</sub> to the atmosphere. Brine volume fraction (b) controls permeability of sea ice  
132 (Golden et al. 1998) and then CO<sub>2</sub> fluxes (Delille et al. 2014; Geilfus et al 2014). The  
133 air-sea ice CO<sub>2</sub> flux is strongly dependent on the sea ice surface conditions (c) (Nomura  
134 et al., 2010a, 2013; Geilfus et al., 2013; 2014; Barber et al., 2014; Brown et al., 2015;  
135 Fransson et al., 2015). Nomura et al. (2013) proposed that snow conditions (e.g., water  
136 equivalent) are important factors affecting gas exchange processes on sea ice. In  
137 addition, frost flowers promote CO<sub>2</sub> flux from the ice to the atmosphere (Geilfus et al.,  
138 2013; Barber et al., 2014; Fransson et al., 2015). For (d), it is thought that for snow  
139 cover, the CO<sub>2</sub> flux is affected by wind pumping (Massman et al., 1995; Takagi et al.,  
140 2005) in which the magnitude of CO<sub>2</sub> flux through snow or overlying soil (e.g., Takagi  
141 et al., 2005) increases due to wind pumping and can increase the transport relative to  
142 molecular diffusion by up to 40% (Bowling and Massman, 2011). These results were  
143 mainly found over land-based snow (soil and forest), and thus these processes are not  
144 well understood over sea ice (Papakyriakou and Miller, 2011).

145  
146 In addition to the processes described above, the CO<sub>2</sub> flux over sea ice may also be  
147 influenced by the temperature difference between the ice surface and the atmosphere.  
148 This has been shown in previous studies in dry snowpacks over land surfaces. These  
149 studies show that there is an unstable air density gradient due to heating at the bottom  
150 producing a strong temperature difference between bottom and top of snow (e.g.,  
151 Powers et al., 1985; Severinghaus et al., 2010). This produces air flow within the  
152 snowpack, which is a potentially significant contributor to mixing and transport of gas

Bruno Delille 2018/3/27 1:57

削除: b

Bruno Delille 2018/3/27 1:57

削除: c

Bruno Delille 2018/3/27 2:04

削除: For (b), t

Nomura Daiki 2018/3/20 9:51

削除: For (c), it is thought

Nomura Daiki 2018/3/20 9:51

削除: for snow cover, the

Bruno Delille 2018/3/27 1:57

削除: c

Nomura Daiki 2018/3/14 14:20

削除: with

Mats Granskog 2018/3/20 13:16

削除: by

161 and heat within the snowpack. We expect that this process would also occur in snow  
162 over sea ice, especially during the wintertime when air temperatures are coldest and the  
163 temperature difference between sea ice surface (snow bottom) and atmosphere is largest  
164 (e.g., Massom et al., 2001). Generally, the sea ice surface under thick snow cover is  
165 warm due to the heat conduction from the bottom of sea ice and the insulation effect of  
166 the snow cover, and a strong temperature difference between sea ice surface and  
167 atmosphere is observed (e.g., Massom et al., 2001). Such a temperature difference  
168 would produce an unstable air density gradient and upward transport of air containing  
169 CO<sub>2</sub> degassed at the sea-ice surface, thereby enhancing CO<sub>2</sub> exchange between sea ice  
170 and atmosphere.

171  
172 In the ice covered Arctic Ocean, storm periods, with high wind speeds and open leads  
173 are important for air-to-sea CO<sub>2</sub> fluxes (Fransson et al., 2017), due to the under-  
174 saturation of the surface waters in CO<sub>2</sub> with respect to the atmosphere. On the other  
175 hand, the subsequent ice growth and frost flowers formation in these leads promote ice-  
176 to-air CO<sub>2</sub> fluxes in winter (e.g. Barber et al., 2014). Given the fact that Arctic sea ice is  
177 shrinking and shifting, from multi-year ice to first-year ice, the area of open ocean and  
178 thinner seasonal ice is increasing. Therefore, the contribution of open ocean/thinner sea  
179 ice surface to the overall CO<sub>2</sub> fluxes of the Arctic Ocean is potentially increasing.  
180 However, due to the difficulty in acquiring observations over the winter pack ice, most  
181 of the winter CO<sub>2</sub> flux measurements were examined over the Arctic landfast ice.  
182 Therefore, there is a definite lack of information on conditions during wintertime,  
183 especially from Arctic pack ice.

184  
185 The Norwegian young sea ICE (N-ICE2015) campaign in winter and spring 2015,  
186 provided opportunities to examine CO<sub>2</sub> fluxes between sea ice and atmosphere in a  
187 variety of snow and ice conditions in pack ice north of Svalbard. Formation of leads and  
188 their rapid refreezing allowed us to examine air-sea ice CO<sub>2</sub> fluxes over thin young sea  
189 ice, occasionally covered with frost flowers in addition to the snow-covered older ice  
190 that covers most of the pack ice area. The objectives of this study were to understand  
191 the effects of i) thin sea ice and frost flowers formations on the air-sea ice CO<sub>2</sub> flux in  
192 leads, ii) effect of snow-cover on the air-sea ice CO<sub>2</sub> flux over thin, young ice in the

- Nomura Daiki 2018/3/27 11:19  
削除: ice covered waters
- Mats Granskog 2018/3/23 6:56  
削除: and storm periods
- Bruno Delille 2018/3/27 1:19  
削除: were
- Bruno Delille 2018/3/27 1:22  
削除: in pack ice
- Bruno Delille 2018/3/27 1:24  
削除: for
- Mats Granskog 2018/3/23 7:00  
削除: becomes
- Bruno Delille 2018/3/27 1:24  
削除: can become
- Bruno Delille 2018/3/27 1:24  
削除: important for the
- Bruno Delille 2018/3/27 2:06  
削除: decreasing
- Mats Granskog 2018/3/23 7:01  
削除: ing
- Bruno Delille 2018/3/27 1:25  
削除: ed
- Bruno Delille 2018/3/27 1:25  
削除: has increased
- Bruno Delille 2018/3/27 2:07  
削除: CO<sub>2</sub> exchange between open ocean/thinner sea ice surface and atmosphere will be an important fraction of the
- Bruno Delille 2018/3/27 2:08  
削除: total
- Bruno Delille 2018/3/27 2:08  
削除: budget
- Bruno Delille 2018/3/27 2:08  
削除: in
- Bruno Delille 2018/3/27 2:10  
削除: During t
- Bruno Delille 2018/3/27 2:10  
削除: , we
- Bruno Delille 2018/3/27 2:10  
削除: had
- Bruno Delille 2018/3/27 2:10  
削除: y
- Nomura Daiki 2018/3/24 17:30  
削除: drift
- Bruno Delille 2018/3/27 2:10  
削除: provided

217 Arctic Ocean during winter and spring seasons, and iii) of the effect of the temperature  
218 difference between sea ice and atmosphere (including snow cover) on the air–sea ice  
219 CO<sub>2</sub> flux.

220

221

## 222 2 Materials and Methods

223

### 224 2.1 Study area

225

226 This study was performed during N-ICE2015 campaign with R/V Lance in the pack ice  
227 north of Svalbard from January to June 2015 (Granskog et al., 2016). Air–sea ice CO<sub>2</sub>  
228 flux measurements were carried out from January to May 2015 during the drift of floes  
229 1, 2, and 3 of the N-ICE2015 campaign (Figures 1 and 2, Table 1). The ice pack was a  
230 mixture of young ice, first-year ice and second-year ice (Granskog et al., 2017), the two  
231 latter with a thick snow cover (Merkouriadi et al., 2017; Rösel et al., 2018). Air–sea ice  
232 CO<sub>2</sub> flux measurements were done over young ice (YI stations), first-year ice (FI  
233 stations), and old ice (multi-year ice) (OI station). In the N-ICE2015 study region modal  
234 ice thickness was about 1.3–1.5 m and modal snow thickness was about 0.5 m (Rösel et  
235 al., 2018). Formation of leads and their rapid refreezing provided us the opportunity to  
236 examine air–sea ice CO<sub>2</sub> fluxes over thin sea ice, occasionally covered with frost  
237 flowers at station YII (Figure 2 and Table 1). Air temperature and wind speed were  
238 measured at a 10 m weather mast on the ice floe installed about 400 m away from R/V  
239 Lance (Cohen et al., 2017).

240

241

### 242 2.2 CO<sub>2</sub> flux measurements

243

244 The air–sea ice CO<sub>2</sub> flux was measured with LI-COR 8100-104 chambers connected to  
245 a LI-8100A soil CO<sub>2</sub> flux system (LI-COR Inc., USA) (Figure 2). This enclosed  
246 chamber method has been widely applied over snow and sea ice (e.g., Schindlbacher et  
247 al., 2007, Geilfus et al., 2015). Two chambers were connected in a closed loop to the  
248 infrared gas analyzer (LI-8100A, LI-COR Inc., USA) to measure CO<sub>2</sub> concentration

Nomura Daiki 2018/3/22 22:15

削除: Norwegian young sea ICE () ... [7]

Mats Granskog 2018/3/20 11:48

削除: site

Bruno Delille 2018/3/27 2:14

削除: F

Nomura Daiki 2018/3/19 13:58

削除: .

Mats Granskog 2018/3/20 11:53

削除: both

Mats Granskog 2018/3/20 11:49

削除: The stations were made for a

Mats Granskog 2018/3/20 11:47

削除: almost

Bruno Delille 2018/3/27 2:15

削除: the

258 through the multiplexer (LI-8150, LI-COR Inc., USA) with an air pump rate at 3 L min<sup>-1</sup>.  
259 <sup>1</sup>. Power was supplied by a car battery (8012-254, Optima Batteries Inc., USA). Four  
260 CO<sub>2</sub> standards (324–406 ppmv) traceable to the WMO scale (Inoue and Ishii, 2005)  
261 were prepared to calibrate the CO<sub>2</sub> gas analyzer prior to the observations. CO<sub>2</sub> flux was  
262 measured in the morning or in the afternoon during low-wind conditions (Table 2), to  
263 minimize the effect of wind on the flux (Bain et al., 2005).

Bruno Delille 2018/3/27 2:15

削除: Electricity

264  
265 One chamber was installed over undisturbed snow or frost flowers over the ice surface.  
266 The chamber collar was inserted 5 cm into the snow and 1 cm into ice at frost flowers  
267 site to avoid air leaks between inside and outside of chamber. The second chamber was  
268 installed on bulk sea ice after removing the snow or frost flowers. Flux measurements  
269 was begun immediately in order to minimize the changes of the ice surface condition. In  
270 order to evaluate the effect of removing snow on sea ice surface temperature, ice surface  
271 temperature was monitored during CO<sub>2</sub> flux measurements at station FI6. To measure  
272 the sea ice surface temperature, temperature sensor (RTR 52, T & D Corp., Japan) was  
273 installed in the top of the ice (1 cm) surface after snow removal. During first CO<sub>2</sub> flux  
274 measurements (about 30 minutes), ice surface temperature was stable at -5.8°C,  
275 suggesting that the effect of removing snow on the variation of sea ice surface  
276 temperature was negligible within 30 minutes. The ice surface temperature decreased  
277 from -5.8°C to -8.0°C at 200 minutes after removal of snow. Therefore, in this paper,  
278 the data of the initial 30 minutes of CO<sub>2</sub> flux measurement after removal of snow or  
279 frost flowers was used. The chamber was closed for 20 minutes in a sequence. The 20-  
280 minute time period was used because CO<sub>2</sub> fluxes over sea ice are much smaller than  
281 over land. The CO<sub>2</sub> concentrations within the chamber were monitored to ensure that  
282 they changed linearly throughout the measurement period (example given in Figure 3).  
283 The CO<sub>2</sub> flux (mmol C m<sup>-2</sup> day<sup>-1</sup>) (positive value indicates CO<sub>2</sub> being released from ice  
284 surface to air) was calculated based on the changes of the CO<sub>2</sub> concentration within the  
285 headspace of the chamber with LI-COR software (Model: LI8100PC Client v.3.0.1.).  
286 The mean coefficient of variation for CO<sub>2</sub> flux measurements was less than 3.0% for  
287 CO<sub>2</sub> flux values larger than ±0.1 mmol C m<sup>-2</sup> day<sup>-1</sup>. For CO<sub>2</sub> flux values smaller than  
288 ±0.1 mmol C m<sup>-2</sup> day<sup>-1</sup>, the mean coefficient of variation for CO<sub>2</sub> flux measurements

Bruno Delille 2018/3/27 2:16

削除: from

Nomura Daiki 2018/3/12 16:10

削除: , and the data of first CO<sub>2</sub> flux measurement was used.

293 was higher than 3.0%, suggesting that the detection limit of this system is about 0.1  
294 mmol C m<sup>-2</sup> day<sup>-1</sup>.

295  
296 In this paper, we express the CO<sub>2</sub> flux measured over the snow and frost flowers as  
297 F<sub>snow</sub> and F<sub>ff</sub>, respectively, and the flux measured directly over the sea ice surface either  
298 on snow-free ice or after removal of snow and frost flowers as F<sub>ice</sub>. F<sub>snow</sub> and F<sub>ff</sub> are the  
299 natural flux (snow and frost flowers are part of the natural system), and F<sub>ice</sub> is the  
300 potential flux in cases when snow or frost flowers are removed. While removal of snow  
301 and frost flowers is an artificial situation, comparisons between F<sub>ice</sub> and F<sub>snow</sub> or F<sub>ff</sub>  
302 provide information about the effect of snow on the CO<sub>2</sub> flux. Therefore, in this study,  
303 we examine both situations for CO<sub>2</sub> flux.

304  
305

### 306 2.3 Sampling of snow, frost flowers, brine, and sea ice

307

308 For salinity measurements, ~~separate samples were taken for snow only, snow and frost~~  
309 ~~flowers, and sea ice surface scrapes. The samples were taken using a plastic shovel,~~  
310 ~~placed into plastic bags and stored in an insulated box for transport to the ship-lab for~~  
311 ~~further processing. Samples were melted slowly (2–3 days) in the dark at +4°C. The~~  
312 ~~temperature of the snow and frost flowers samples were measured during CO<sub>2</sub> flux~~  
313 ~~measurements (approximately 60 minutes after the onset of the CO<sub>2</sub> flux measurement)~~  
314 using a needle-type temperature sensor (Testo 110 NTC, Brandt Instruments, Inc.,  
315 USA). ~~The accuracy of this sensor is ±0.2°C. Snow density was obtained using a fixed~~  
316 volume sampler (Climate Engineering, Japan) and weight measurement. The depth of  
317 the snow pack and frost flowers was also recorded using a ruler.

318

319 Brine was ~~also collected at stations FI3–6 for salinity, dissolved inorganic carbon (DIC)~~  
320 ~~and total alkalinity (TA) measurements. Brine was collected from sackholes as~~  
321 ~~described in Gleitz et al. (1995). The sackholes were drilled using a 9 cm diameter ice~~  
322 ~~corer (Mark II coring system, Kovacs Enterprises, Inc., USA) to a depth of 30 cm. The~~  
323 sackholes were ~~then~~ covered with a lid of 5 cm-thick urethane to reduce heat and gas  
324 transfer between brine and atmosphere. When ~~brine~~ accumulated at the bottom of the

Lana Cohen 2018/3/19 9:47  
削除: was sampled, while while...now [8]

Nomura Daiki 2018/3/20 14:41  
削除: s

Lana Cohen 2018/3/19 9:50  
削除: generally...pproximately,...60 n... [9]

Lana Cohen 2018/3/19 9:52  
削除: ...tations FI3–6 for determina... [10]

Mats Granskog 2018/3/20 11:57  
削除: ,

Lana Cohen 2018/3/19 9:53  
削除: )... First...he sFirst, s...ckhole... [11]

366 | sackholes (approximately 15 minutes), it was collected with a plastic syringe (AS ONE  
367 | Corporation, Japan) and kept in 500 mL unbreakable plastic bottles (I-Boy, AS ONE  
368 | Corporation, Japan) in order to facilitate safe transport to the sampling sites in cold and  
369 | harsh conditions. The brine bottles were filled without head-space and immediately  
370 | stored in an insulated box to prevent freezing. Immediately after return to the ship, the  
371 | brine samples were transferred to 250 mL borosilicate bottles (DURAN Group GmbH,  
372 | Germany) for DIC and TA measurements using tubing to prevent contact with air. The  
373 | samples were preserved with saturated mercuric chloride (HgCl<sub>2</sub>, 60 µL for a 250 mL  
374 | sample) and stored in the dark at +10°C until analyses was performed at the Institute of  
375 | Marine Research, Norway.

Lana Cohen 2018/3/19 9:54

削除: the brinebrine...t was collected... [12]

376 |  
377 | Sea ice was collected by same ice corer as described for brine collection and at the same  
378 | location as snow and frost flowers were collected. Sea ice temperature was measured by  
379 | same sensor as described for snow. For the ice cores, the temperature sensor was  
380 | inserted in small holes drilled into the core. The core was then cut with a stainless steel  
381 | saw into 10 cm sections and stored in plastic bags for subsequent salinity measurements.  
382 | The ice core sections were kept at +4°C and melted in the dark prior to measurement.

Lana Cohen 2018/3/20 9:51

削除: Ice...ea i...e temperature was ... [13]

Mats Granskog 2018/3/20 11:58

削除: .

## 385 | 2.4 Sample analysis

386 |  
387 | Salinities for melted snow, frost flowers, sea ice, and brine were measured with a  
388 | conductivity sensor (Cond 315i, WTW GmbH, Germany). For calibration of salinity  
389 | measurement, a Guildline PORTASAL salinometer Model 8410A, standardized by  
390 | International Association for the Physical Sciences of the Oceans (IAPSO) standard  
391 | seawater (Ocean Scientific International Ltd, UK) was used. Accuracy of this sensor  
392 | was ±0.003.

Nomura Daiki 2018/3/14 14:21

削除: -...now, -...rost flowers, -...ea ... [14]

393 |  
394 | Analytical methods for DIC and TA determination are fully described in Dickson et al.  
395 | (2007). DIC in brine was determined using gas extraction of acidified sample followed  
396 | by coulometric titration and photometric detection using a Versatile Instrument for the  
397 | Determination of Titration carbonate (VINDTA 3C, Germany). TA of brine was

430 determined by potentiometric titration of 40 mL sample in open cell with 0.05 N  
431 hydrochloric acid using a Titrino system (Metrohm, Switzerland). The average standard  
432 deviation for DIC and TA, determined from replicate sample analyses from one sample,  
433 was within  $\pm 2 \mu\text{mol kg}^{-1}$  for both DIC and TA. Accuracy of the DIC and TA  
434 measurements were  $\pm 2 \mu\text{mol kg}^{-1}$  for both DIC and TA estimated using Certified  
435 Reference Materials (CRM, provided by A. G. Dickson, Scripps Institution of  
436 Oceanography, USA). The  $\text{pCO}_2$  of brine ( $\text{pCO}_{2\text{b}}$ ) was derived from in situ temperature,  
437 salinity, DIC and TA of brine using the carbonate speciation program CO2SYS (Pierrot  
438 et al., 2006). We used the carbonate dissociation constants ( $K_1$  and  $K_2$ ) of Mehrbach et  
439 al. (1973) as refit by Dickson and Millero (1987), and the  $\text{KSO}_4$  determined by Dickson  
440 (1990). The conditional stability constants used to derived  $\text{pCO}_2$  are strictly only valid  
441 for temperatures above 0 °C and salinities between 5 and 50. Studies in spring ice  
442 indicated that seawater thermodynamic relationships may be acceptable in warm and  
443 low-salinity sea ice (Delille et al., 2007). In sea ice brines at even moderate brine  
444 salinities of 80, Brown et al. (2014) found that measured and calculated values of the  
445  $\text{CO}_2$  system parameters can differ by as much as 40%. On the other hand, because the  
446  $\text{CO}_2$  system parameters are much more variable in sea ice than in seawater, sea ice  
447 measurements demand less precision than those in seawater. Fransson et al. (2015)  
448 performed one of few detailed analyses of the internal consistency using four sets of  
449 dissociation constants and found that the deviation between measured and calculated  
450 DIC varied between  $\pm 6$  and  $\pm 11 \mu\text{mol kg}^{-1}$ , respectively. This error in calculated DIC  
451 was considered insignificant in relation to the natural variability in sea ice.

452  
453 The  $\text{pCO}_2$  of atmosphere was calculated from  $\text{CO}_2$  concentration (ppmv) at Ny-Ålesund,  
454 Svalbard (<http://www.esrl.noaa.gov/gmd/dv/iadv/>) taking into account saturated water  
455 vapor and atmospheric pressure during sampling day.

456  
457 The water equivalent was computed for snow by multiplying snow thickness by snow  
458 density (Jonas et al., 2009). Brine volume of sea ice was calculated from the  
459 temperature and salinity of sea ice according to Cox and Weeks (1983) and Petrich and  
460 Eicken (2010).

461



462  
463  
464  
465  
466  
467  
468  
469  
470  
471  
472  
473  
474  
475  
476  
477  
478  
479  
480  
481  
482  
483  
484  
485  
486  
487  
488  
489  
490  
491  
492  
493

### 3 Results

#### 3.1 Air temperature

Air temperature is shown in Figure 4. During the study period, air temperature varied significantly from a low of  $-41.3^{\circ}\text{C}$  (30 January) to a high of  $+1.7^{\circ}\text{C}$  (15 June) (Hudson et al., 2015). Even in wintertime (from January to March), rapid increases of air temperature from below  $-30^{\circ}\text{C}$  up to  $-0.2^{\circ}\text{C}$  (e.g., 18 February), were observed. In springtime (from April to June), the air temperature increased continuously, and from 1 June, air temperatures were near  $0^{\circ}\text{C}$ , although rapid increases (and subsequent decreases) of air temperature to near  $0^{\circ}\text{C}$  were observed on two occasions in mid-May (Cohen et al., 2017).

#### 3.2 Characteristics of snow, sea ice, and frost flowers

The snow and ice thickness at the observation sites ranged between 0.0 and 60.0 cm and between 15.0 and  $>200$  cm, respectively (Table 1). The thin snow and ice represent newly formed ice in leads at station YII. The thickness of the frost flowers ranged from 1.0 to 2.5 cm.

Figure 5 shows vertical profiles of snow and ice temperature and salinity in the top 20 cm of ice. Temperatures within the snowpack depended on the air temperature at the time of observation. However, the bottom of the snow and the surface of the sea ice were relatively warm ( $T > -7.5^{\circ}\text{C}$ ), except for the frost flowers station YII and the multi-year ice station OII (Figure 5a and Table 2). High salinities ( $S > 18.6$ ) characterized the bottom of the snow and the surface of the sea ice, except for the multi-year ice station OII (Figure 5b). At the multi-year ice station OII, salinity was zero through the snow and top of sea ice. Salinity of frost flowers was up to 92.8 for the thin ice station YII (Figure 5b). Snow density and water equivalent ranged from 268 to  $400\text{ kg m}^{-3}$  and 11 to  $180\text{ kg m}^{-2}$ , respectively.

Nomura Daiki 2018/3/22 16:54

削除: 3

Nomura Daiki 2018/3/19 14:02

削除: -constant

Nomura Daiki 2018/3/22 22:31

削除: 4

Nomura Daiki 2018/3/22 17:17

削除: 4a

Nomura Daiki 2018/3/22 22:32

削除: ,

Nomura Daiki 2018/3/22 17:17

削除: 4b

Nomura Daiki 2018/3/22 17:17

削除: 4b

501  
502  
503  
504  
505  
506  
507  
508  
509  
510  
511  
512  
513  
514  
515  
516  
517  
518  
519  
520  
521  
522  
523  
524  
525  
526  
527  
528  
529  
530  
531

### 3.3 Physical and chemical properties of brine

The brine volume fraction, temperature, salinity, DIC, TA, and calculated pCO<sub>2</sub> are summarized in Table 2. Brine volume fraction in top 20 cm of ice was from 9 to 17%, except for the value of 0% at the multi-year ice station OI1 (Table 2). Brine temperatures and salinity ranged from -5.3 to -3.3°C and 51.8 to 86.6, respectively. DIC and TA of brine ranged from 3261 to 4841 μmol kg<sup>-1</sup> and 3518 to 5539 μmol kg<sup>-1</sup>, respectively. The pCO<sub>2</sub> of brine (pCO<sub>2b</sub>) (334–693 μatm) was generally higher than that of atmosphere (pCO<sub>2a</sub>) (401 ± 7 μatm), except for station FI4.

### 3.4 CO<sub>2</sub> flux

Table 3 summarizes the CO<sub>2</sub> flux measurements for each surface condition. For undisturbed natural surface conditions, i.e. measurements directly on the snow surface (F<sub>snow</sub>) or the frost flowers (F<sub>ff</sub>) on young ice, the mean CO<sub>2</sub> flux was +0.2 ± 0.2 mmol C m<sup>-2</sup> day<sup>-1</sup> for F<sub>snow</sub> and +1.0 ± 0.6 mmol C m<sup>-2</sup> day<sup>-1</sup> for F<sub>ff</sub>. The potential flux in cases when snow or frost flowers had been removed (F<sub>ice</sub>) was +2.5 ± 4.3 mmol C m<sup>-2</sup> day<sup>-1</sup>. The air–sea ice CO<sub>2</sub> fluxes measured over the ice surface (F<sub>ice</sub>) increased with increasing difference in pCO<sub>2</sub> between brine and atmosphere (ΔpCO<sub>2b-a</sub>) with significant correlation (R<sup>2</sup> = 0.9, p < 0.02), but this was not the case for F<sub>snow</sub> (R<sup>2</sup> = 0.0, p < 0.96) (Figure 6).

## 4 Discussion

### 4.1 Effect of snow cover on the physical properties of sea ice surface

532 | In this study, we examined CO<sub>2</sub> fluxes between sea ice and atmosphere in a variety of  
533 | air temperature conditions from –32 to –3°C and diverse snow and ice conditions (Table  
534 | 2). The bottom of the snow pack and the surface of the sea ice remained relatively warm  
535 | (>–7.5°C) (Figure 5a, Table 2), except for stations OI1 and YII, even though air  
536 | temperature was sometimes below –40°C (Figure 4). Relatively warm ice temperatures  
537 | were likely due to the upward heat transport from the bottom of the ice and in some  
538 | cases the thick insulating snow cover, except for stations OI1 and YII, (Table 2).  
539 | Therefore, snow acted as thermal insulator over sea ice, and in general the snow depths  
540 | observed during N-ICE2015 point towards this being representative for first-year and  
541 | second-year or older ice in the study region in winter 2015 (Rösel et al., 2018). The  
542 | young and first-year ice surfaces were characterized by high salinities (Figure 5b).  
543 | During sea ice formation, upward brine transport to the snow pack occurs (e.g., Toyota  
544 | et al., 2011). In addition, brine within the sea ice was not completely drained as  
545 | compared to that of multi-year ice. Furthermore, formation of frost flowers and  
546 | subsequent wicking up of surface brine into the frost flowers also provides high salinity  
547 | at the surface of sea ice (Kaleschke et al., 2004; Geilfus et al., 2013; Barber et al., 2014;  
548 | Fransson et al., 2015) as observed in this study (S>92) (Figure 5b). Snowfall over the  
549 | frost flowers would have preserved the high salinity at the bottom of snow pack and top  
550 | of sea ice for young and first-year ice.

551 |  
552 | As a result of the combination of the relatively high temperature and high salinity at the  
553 | top of sea ice, brine volume fractions in the upper parts of the sea ice were high, up to  
554 | 17% (Table 2). It has been shown that ice permeability increases by an order of  
555 | magnitude when brine volume fraction > 5%, which would correspond to a temperature  
556 | of –5°C for a bulk ice salinity of 5 – the so called “law of fives” (Golden et al., 1998;  
557 | Pringle et al., 2009; Zhou et al., 2013). Because sea ice temperatures were low and  
558 | thereby reduced permeability in winter season, generally, air–sea ice CO<sub>2</sub> flux is at its  
559 | minimum in the winter (e.g., Delille et al., 2014). However, in our study, the brine  
560 | volume fractions were generally >9%, except for station OI1 with fresh ice at the  
561 | surface, providing conditions for active gas exchange within sea ice and between sea ice  
562 | and atmosphere. This situation was likely made possible due to the thick snow cover  
563 | and relatively thin and young sea ice.

Nomura Daiki 2018/3/22 17:18  
 削除: 4a

Nomura Daiki 2018/3/22 17:18  
 削除: 3

Lana Cohen 2018/3/20 9:51  
 削除: (Table

Nomura Daiki 2018/3/20 9:51  
 削除: (Table

Lana Cohen 2018/3/19 10:11  
 削除: ed

Nomura Daiki 2018/3/22 22:18  
 削除: 6a

Nomura Daiki 2018/3/22 17:18  
 削除: 4b

Nomura Daiki 2018/3/22 17:18  
 削除: 4b

Lana Cohen 2018/3/19 10:12  
 削除: was

573  
574  
575  
576  
577  
578  
579  
580  
581  
582  
583  
584  
585  
586  
587  
588  
589  
590  
591  
592  
593  
594  
595  
596  
597  
598  
599  
600  
601  
602  
603  
604

## 4.2 CO<sub>2</sub> fluxes over different sea-ice surface types

The CO<sub>2</sub> flux measurements over different surface conditions indicate that the snow cover over sea ice affects the magnitude of air–sea ice CO<sub>2</sub> flux, especially for stations FI5 and FI6 (Table 3). For undisturbed natural surface conditions, the CO<sub>2</sub> flux measured directly over snow-covered first-year ice and young ice with frost flowers ( $F_{\text{snow}}$  and  $F_{\text{ff}}$ ) was lower in magnitude than that for potential flux obtained directly over the ice surface after removing snow ( $F_{\text{ice}}$ ), especially for stations FI5, FI6, and Y11.  $F_{\text{ff}}$  indicates that the frost flowers surface on young thin ice is a CO<sub>2</sub> source to the atmosphere and  $F_{\text{ff}}$  was higher than  $F_{\text{snow}}$ , except for station FI1. Frost flowers are known to promote gas flux, such as CO<sub>2</sub>, from the sea ice to the atmosphere (Geilfus et al., 2013; Barber et al., 2014; Fransson et al., 2015). At multi-year ice station OI1, neither snow or ice surface acted as a CO<sub>2</sub> source/sink. The surface of multi-year ice did not contain any brine (Figure 5b and Table 2), and the top of the ice was clear, colorless and very hard, suggesting superimposed formation at the top of sea ice. This situation would be similar as for freshwater-ice and superimposed-ice as these non-porous media block gas exchange effectively at the sea ice surface (Delille et al., 2014). Snow-ice and superimposed-ice were frequently found in second-year ice cores during N-ICE2015 (Granskog et al., 2017), so the ‘blocking’ of gas exchange in second-year and multi-year ice may be a widespread process in the Arctic.

The magnitude of positive  $F_{\text{snow}}$  is less than  $F_{\text{ice}}$  for stations FI5 and FI6 (Table 3) indicating that the potential CO<sub>2</sub> flux from sea ice decreased due to the presence of snow. Previous studies have shown that snow accumulation over sea ice effectively impede CO<sub>2</sub> exchange (Nomura et al., 2013; Brown et al., 2015). Nomura et al. (2013) reported that 50–90% of the potential CO<sub>2</sub> flux was reduced due to the presence of snow/superimposed-ice at the water equivalent of 57–400 kg m<sup>-2</sup>, indicating that the snow properties are an important factor that controls the CO<sub>2</sub> exchange through a snowpack. Comparisons between stations FI5 and FI6 for  $F_{\text{snow}}/F_{\text{ice}}$  ratio (0.2 for FI5

- Lana Cohen 2018/3/20 9:51  
削除: on
- Lana Cohen 2018/3/19 10:13  
削除: on
- Lana Cohen 2018/3/20 9:51  
削除: affect
- Nomura Daiki 2018/3/19 10:06  
削除:
- Nomura Daiki 2018/3/19 10:13  
削除: mean
- Nomura Daiki 2018/3/19 10:13  
削除: ethe
- Nomura Daiki 2018/3/19 10:14  
削除: ..
- Nomura Daiki 2018/3/22 17:19  
削除: 4
- Nomura Daiki 2018/3/14 10:51  
削除:
- Nomura Daiki 2018/3/22 22:56  
削除: (Table 3)
- Bruno Delille 2018/3/27 3:35  
削除: through
- Nomura Daiki 2018/3/14 11:03  
削除: that water equivalent of the
- Mats Granskog 2018/3/23 7:12  
削除: is

618 and 0.0 for FI6) and water equivalent (11 kg m<sup>-2</sup> for FI5 and 127 kg m<sup>-2</sup> for FI6)  
619 indicate that the potential CO<sub>2</sub> flux is reduced (80% for FI5 and 98% for FI6 of the  
620 potential CO<sub>2</sub> flux) with increasing water equivalent. Although the magnitude of the  
621 potential CO<sub>2</sub> flux through the sea ice surface decreased by the presence of snow for  
622 stations FI5 and FI6 (Table 3), the snow surface still presents a CO<sub>2</sub> source to the  
623 atmosphere for low snow density and shallow depth conditions (e.g., +0.6 mmol C m<sup>-2</sup>  
624 day<sup>-1</sup> for FI5).

625  
626 For F<sub>ice</sub>, there were negative CO<sub>2</sub> fluxes at stations FI3 and FI4 (-0.6 mmol C m<sup>-2</sup> day<sup>-1</sup>  
627 for FI3 and -0.8 mmol C m<sup>-2</sup> day<sup>-1</sup> for FI4) (Table 3). These fluxes corresponded to low  
628 or negative ΔpCO<sub>2 b-a</sub> as compared to that in atmosphere (Table 2 and Figure 6).  
629 Negative CO<sub>2</sub> fluxes should correspond to negative ΔpCO<sub>2 b-a</sub>. Therefore, the  
630 uncertainty for the calculation of carbonate chemistry may be one reason for the  
631 discrepancy in pCO<sub>2</sub> calculation in these conditions (Brown et al., 2014).

### 634 4.3 Comparison to earlier studies on sea-ice to air CO<sub>2</sub> flux

635  
636 The CO<sub>2</sub> fluxes measured over the undisturbed natural surface conditions (F<sub>snow</sub> and F<sub>ff</sub>)  
637 in this study ranged from +0.1 to +1.6 mmol C m<sup>-2</sup> day<sup>-1</sup> (Table 3), which are at the  
638 lower end of the reported range based on the chamber method and eddy covariance  
639 method for natural and artificial sea ice (-259.2 to +74.3 mmol C m<sup>-2</sup> day<sup>-1</sup>)  
640 (Zemmelink et al., 2006; Nomura et al., 2006, 2010a, 2010b, 2013; Miller et al., 2011;  
641 Papakyriakou and Miller, 2011; Geilfus et al., 2012, 2013; 2014; Barber et al., 2014;  
642 Delille et al., 2014; Sørensen et al., 2014; Brown et al., 2015; Kotovitch et al., 2016).  
643 Direct comparison to previous studies is complicated because CO<sub>2</sub> flux measurements  
644 with both chamber and eddy covariance techniques were used during different condition  
645 for season and ice surface characteristics. In addition, discrepancies between chamber  
646 and eddy covariance measurements of air-ice CO<sub>2</sub> fluxes have been repeatedly observed.  
647 The footprint size of CO<sub>2</sub> exchange measured with the two approaches (Zemmelink et  
648 al., 2006, 2008; Burba et al., 2008; Amiro, 2010; Miller et al., 2011; Papakyriakou and  
649 Miller, 2011; Sørensen et al., 2014; Miller et al., 2015) may be one reason for the large

Nomura Daiki 2018/3/14 11:15

削除: affected

Mats Granskog 2018/3/23 7:12

削除: the

Nomura Daiki 2018/3/14 11:26

削除: by snow properties (density and depth)

Mats Granskog 2018/3/23 7:12

削除: for

Bruno Delille 2018/3/27 3:38

削除: Generally, when

Bruno Delille 2018/3/27 3:38

削除: is negative,

Bruno Delille 2018/3/27 3:38

削除: should be negative

657 difference. The eddy covariance method reflects a flux integrated over a large area, that  
658 can contain several different surface types. Therefore, eddy-covariance appears to be  
659 more useful for understanding fluxes at large spatial and temporal scales. On the other  
660 hand, the chamber method reflects the area where chamber was covered, and it is useful  
661 for understanding the relationship between fluxes and ice surface conditions on smaller  
662 scales. The different spatial scales of the two methods may be therefore one reason for  
663 the discrepancy in CO<sub>2</sub> flux measurements.

665 Comparison of the natural CO<sub>2</sub> flux range (+0.1 to +1.6 mmol C m<sup>-2</sup> day<sup>-1</sup> for F<sub>snow</sub> and  
666 F<sub>ff</sub>) (Table 3) with previous estimates derived from the chamber method (-5.2 to +6.7  
667 mmol C m<sup>-2</sup> day<sup>-1</sup>) (Nomura et al., 2006, 2010a, 2010b, 2013; Geilfus et al., 2012,  
668 2013; 2014; Barber et al., 2014; Delille et al., 2014; Brown et al., 2015; Kotovitch et al.,  
669 2016) (these studies include both natural and potential fluxes) shows that CO<sub>2</sub> fluxes  
670 during NICE2015 experiment are at the lower end of positive values. However, our  
671 potential CO<sub>2</sub> flux (F<sub>ice</sub>) was a larger CO<sub>2</sub> source (up to +11.8 mmol C m<sup>-2</sup> day<sup>-1</sup>) than  
672 reported in previous studies (+6.7 mmol C m<sup>-2</sup> day<sup>-1</sup>). In our study, the maximum  
673 potential flux (e.g., +11.8 mmol C m<sup>-2</sup> day<sup>-1</sup>) was obtained for F<sub>ice</sub> at station FI6 (Table  
674 3). In this situation, ΔpCO<sub>2 b-a</sub> (293 μatm) was the highest (Table 2 and Figure 6), and it  
675 is reasonable to consider this as the highest magnitude of positive CO<sub>2</sub> flux within our  
676 study. However, a previous study by closed chamber method showed that even for a  
677 similar ΔpCO<sub>2 b-a</sub> (297 μatm) and magnitude for the brine volume fraction (10–15%),  
678 the CO<sub>2</sub> flux was +0.7 mmol C m<sup>-2</sup> day<sup>-1</sup> for artificial sea ice with no snow in the tank  
679 experiment (Nomura et al., 2006).

681 The CO<sub>2</sub> flux between the sea ice and overlying air can be expressed by the following  
682 equation,

$$684 F_{\text{CO}_2} = r_b k \alpha \Delta p\text{CO}_{2\text{ b-a}},$$

686 where r<sub>b</sub> is the ratio of surface of the brine channel to sea ice surface, and we assume  
687 that the value of r<sub>b</sub> is equal to brine volume fraction, k is the gas transfer velocity, α is  
688 the solubility of CO<sub>2</sub> (Weiss, 1974), and ΔpCO<sub>2 b-a</sub> is the difference in pCO<sub>2</sub> between

Bruno Delille 2018/3/27 3:45

削除: the average

Bruno Delille 2018/3/27 3:43

削除:

Mats Granskog 2018/3/23 7:13

削除: a

Bruno Delille 2018/3/27 3:49

削除: And it is, t

Bruno Delille 2018/3/27 3:50

削除: st

Bruno Delille 2018/3/27 3:46

削除: large scale

Bruno Delille 2018/3/27 3:50

削除: Therefore, t

Mats Granskog 2018/3/20 12:09

削除: difference

Bruno Delille 2018/3/27 3:51

削除: When we compare

Bruno Delille 2018/3/27 3:51

削除: our

Bruno Delille 2018/3/27 3:51

削除: to

Bruno Delille 2018/3/27 3:51

削除: made

Bruno Delille 2018/3/27 3:51

削除: by

Bruno Delille 2018/3/27 3:52

削除: in previous studies

Bruno Delille 2018/3/27 3:52

削除: , our

Bruno Delille 2018/3/27 3:53

削除: In the following, we will discuss this difference.

Nomura Daiki 2018/3/14 14:36

削除: (F)

Mats Granskog 2018/3/23 8:15

削除: lux

708 brine and atmosphere. The equation is based on the fact that CO<sub>2</sub> transfer between  
709 seawater and air is controlled by processes in the near-surface water (Liss, 1973). The  
710 gas transfer velocity (k) calculated from F, r<sub>b</sub>, α and ΔpCO<sub>2 b-a</sub> was 5.12 m day<sup>-1</sup> for F<sub>ice</sub>  
711 at station FI6 and 0.29 m day<sup>-1</sup> for the tank experiment examined in Nomura et al.  
712 (2006). This result clearly indicates that the gas transfer velocity for F<sub>ice</sub> at station FI6 is  
713 higher than that of tank experiment examined in Nomura et al. (2006) even with very  
714 similar ΔpCO<sub>2 b-a</sub> and brine volume fraction.

715  
716 Here, we surmise that the gas transfer velocity and thereby CO<sub>2</sub> flux is greatly enhanced  
717 by the temperature difference between sea ice surface and atmosphere. Previous studies  
718 indicate that there is an unstable air density gradient in a dry snowpack due to basal  
719 heating and the strong temperature difference develops between bottom and top of snow  
720 (e.g., Powers et al., 1985; Severinghaus et al., 2010), which enhances the flow of air  
721 through the snowpack. We propose that the mixing and transport of gas within the  
722 snowpack could also occur over sea ice. Because temperatures at the bottom of snow  
723 and the top of sea ice were relatively warm due to a thick insulating snow over sea ice,  
724 there was a strong temperature difference between sea ice surface and atmosphere when  
725 air temperature was low (Figure 5a and Table 2). For station FI6, temperature difference  
726 between sea ice surface and atmosphere was 20.2°C after snow removal. On the other  
727 hand, in the tank experiment by Nomura et al. (2006), the temperature difference  
728 between sea ice surface (top 1.5 cm) and air in the headspace was only 4.5°C.

729  
730 Figure 6 shows the relationship between mean air–sea ice CO<sub>2</sub> fluxes and temperature  
731 difference between ice and atmosphere. The strong dependence of CO<sub>2</sub> flux with  
732 temperature difference (T<sub>ice</sub>–T<sub>a</sub>) was observed, especially for F<sub>ff</sub> and F<sub>ice</sub> (R<sup>2</sup> > 0.7, p <  
733 0.01) (Figure 6). Due to the high brine volume fractions (Table 2), sea ice surface had  
734 enough permeability for gas exchange. In addition, ice temperatures were similar for  
735 young and first-year ice (Figure 6, Table 2), indicating that pCO<sub>2</sub> at the top of sea ice  
736 and CO<sub>2</sub> flux would be of similar order of magnitude if thermodynamic processes  
737 dominated. Therefore, our results suggest that the CO<sub>2</sub> fluxes even over the frost  
738 flowers as a natural condition, would be enhanced by the upward transport of air  
739 containing high CO<sub>2</sub> from the surface of sea ice to the atmosphere due to the strong

Nomura Daiki 2018/3/22 23:06

削除: 4a

Nomura Daiki 2018/3/20 9:51

削除: 5

Nomura Daiki 2018/3/20 9:51

削除: 5

Nomura Daiki 2018/3/20 13:22

削除: 5

Lana Cohen 2018/3/20 9:51

削除: result

745 temperature difference between sea ice surface and atmosphere. Although the presence  
746 of snow on sea ice has potential to produce a larger temperature difference between sea  
747 ice surface and atmosphere and promote the upward transport, the magnitude of the CO<sub>2</sub>  
748 flux decreased due to the presence of snow. However, for young sea ice with frost  
749 flowers (e.g., station Y11), ice surface temperature was warm (Table 2), suggesting that  
750 CO<sub>2</sub> flux would be enhanced by the large temperature difference between sea ice  
751 surface and atmosphere.

Nomura Daiki 2018/3/14 13:40

削除: likely

Lana Cohen 2018/3/19 10:15

削除: the

Lana Cohen 2018/3/19 10:15

削除: conditions

752

753

754

## 755 5 Conclusions

756

757 We measured CO<sub>2</sub> fluxes along with sea ice and snow physical and chemical properties  
758 over first-year and young sea ice north of Svalbard in the Arctic pack ice. Our results  
759 suggest that young thin snow-free ice, with or without frost flowers, is a source of  
760 atmospheric CO<sub>2</sub> due to the high pCO<sub>2</sub> and salinity and relatively high sea ice  
761 temperature. Although the potential CO<sub>2</sub> flux from sea-ice surface decreased due to the  
762 presence of snow, snow surface still presents a modest CO<sub>2</sub> source to the atmosphere  
763 for low snow density and shallow depth situations. The highest ice to air fluxes were  
764 observed over thin young sea ice formed in leads. During N-ICE2015 the ice pack was  
765 dynamic, and formation of open water was associated with storms, where new ice was  
766 formed. The subsequent ice growth in these leads becomes important for the ice-to-air  
767 CO<sub>2</sub> fluxes in winter due to the fact that the flux from young ice is an order of  
768 magnitude larger than from snow-covered first-year and older ice.

Nomura Daiki 2018/3/24 17:30

削除: drift

Mats Granskog 2018/3/23 7:19

削除: pack

Bruno Delille 2018/3/27 3:54

削除: through

Bruno Delille 2018/3/27 3:54

削除: the

769

770

771

## 772 6 Data availability

773

774 Data used in this paper will be available at Norwegian Polar Data Centre  
775 (data.npolar.no).

776

Nomura Daiki 2018/3/14 13:44

削除: Open leads and storm periods were important for air-to-sea CO<sub>2</sub> fluxes (Fransson et al., 2017), due to undersaturation of the surface waters, while t

Nomura Daiki 2018/3/16 12:44

削除: .

[15]



790  
791  
792  
793  
794  
795  
796  
797  
798  
799  
800  
801  
802  
803  
804  
805  
806  
807  
808  
809  
810  
811  
812  
813  
814  
815  
816  
817  
818  
819  
820

## 7 Acknowledgments

We would like to express heartfelt thanks to the crew of R/V Lance and all members of the N-ICE2015 expedition for their support in conducting the field work. This work was supported by the Japan Society for the Promotion of Science (#15K16135, #24-4175), Research Council of Norway (KLIMAFORSK programme, grant 240639), the Centre of Ice, Climate and Ecosystems (ICE) at the Norwegian Polar Institute through the N-ICE project, the Ministry of Climate and Environment and the Ministry of Foreign Affairs of Norway and the Grant for Joint Research Program of the Institute of Low Temperature Science, Hokkaido University. AF, MC and MAG were supported by the flagship research program "Ocean acidification and ecosystem effects in Northern waters" within the FRAM-High North Research Centre for Climate and the Environment. [BD is a research associate of the F.R.S-FNRS.](#)

## Reference list

- Amiro, B.: Estimating annual carbon dioxide eddy fluxes using open-path analysers for cold forest sites. *Agr. Forest Meteorol.*, 150, 15, 1366–1372. 2010.
- [Bain, W. G., Hutyra, L., Patterson, D. C., Bright, A. V., Daube, B. C. Munger, J. W., Wofsy, S. C.: Wind-induced error in the measurement of soil respiration using closed dynamic chambers. \*Agricul. Forest Meteo.\*, 131, 3–4, 225–232, 2005.](#)
- Barber, D. G., Ehn, J. K., Pućko, M., Rysgaard, S., Deming, J. W. and co-authors: Frost flowers on young Arctic sea ice: The climatic, chemical and microbial significance of an emerging ice type. *J Geophys. Res.-Atmos.* doi: 10.1002/2014JD021736. 2014.

Bruno Delille 2018/3/27 2:12

削除:

822 | Brown, K. A., Miller, L. A., Davelaar, M., Francois, R., and Tortell P. D.: Over-  
823 | determination of the carbonate system in natural sea ice brine and assessment of  
824 | carbonic acid dissociation constants under low temperature, high salinity conditions.  
825 | *Mar. Chem* 165: 36–45. doi: 10.1016/j.marchem.2014.07.005. 2014.  
826 |  
827 | Brown, K. A., Miller, L.A., Mundy, C. J., Papakyriakou, T., Francois, R., and co-  
828 | authors: Inorganic carbon system dynamics in landfast Arctic sea ice during the early-  
829 | melt period. *J. Geophys. Res. Oceans*, 120, 3542–3566.  
830 | <http://dx.doi.org/10.1002/2014JC010620>. 2015.  
831 |  
832 | Burba, G., McDermitt, D., Grelle, A., Anderson, D., and Xu, L.: Addressing the  
833 | influence of instrument surface heat exchange on the measurements of CO<sub>2</sub> flux from  
834 | open-path gas analyzers, *Global Change Biol.*, 14, 8, 1854–1876, 2008.  
835 |  
836 | Cohen, L., Hudson, S. R., Walden, V. P., Graham, R. M., and Granskog, M. A.:  
837 | Meteorological conditions in a thinner Arctic sea ice regime from winter through  
838 | summer during the Norwegian young sea ICE expedition (N-ICE2015), *J. Geophys. Res.*  
839 | *Atmos.*, 122, 7235–7259, doi:10.1002/2016JD026034, 2017.  
840 |  
841 | Cox, G. F. N., and Weeks W. F.: Equations for determining the gas and brine volumes  
842 | in sea-ice samples, *J. Glaciol.*, 29, 306–316, 1983.  
843 |  
844 | Delille, B., Jourdain, B., Borges, A. V., Tison, J.-L., and Delille, D.: Biogas (CO<sub>2</sub>, O<sub>2</sub>,  
845 | dimethylsulfide) dynamics in spring Antarctic fast ice, *Limnol. Oceanogr.*, 52, 1367–  
846 | 1379, 2007.  
847 |  
848 | Delille, B., Vancoppenolle, M., Geilfus, N.-X., Tilbrook, B. Lannuzel.D., and co-  
849 | authors: Southern Ocean CO<sub>2</sub> sink: the contribution of the sea ice, *J. Geophys. Res.*  
850 | *Oceans*. 119 (9), 6340–6355, 2014.  
851 |  
852 | Dickson, A. G., and Millero F. J.: A comparison of the equilibrium constants for the  
853 | dissociation of carbonic acid in seawater media, *Deep-Sea Res.* 34, 1733–1743, 1987.

854 |  
855 | Dickson, A. G.: Thermodynamics of the dissociation of boric acid in synthetic seawater  
856 | from 273.15 to 318.15 K, *Deep-Sea Res.* 37, 755–766, 1990.

857 |  
858 | Dickson, A. G., Sabine, C. L., and Christian, J. R. Eds.: Guide to Best Practices for  
859 | Ocean CO<sub>2</sub> Measurements, PICES Special Publication, 3, 191 pp, 2007.

860 |  
861 | Fransson, A., Chierici, M., Miller, L. A., Carnat, G., Thomas, H., and co-authors:  
862 | Impact of sea ice processes on the carbonate system and ocean acidification state at the  
863 | ice-water interface of the Amundsen Gulf, Arctic Ocean, *J. Geophys. Res.*, 118, 1–23,  
864 | doi:10.1002/2013JC009164, 2013.

865 |  
866 | Fransson, A., Chierici, M., Abrahamsson, K., Andersson, M., Granfors, A., and co-  
867 | authors: CO<sub>2</sub>-system development in young sea ice and CO<sub>2</sub> gas exchange at the ice/air  
868 | interface mediated by brine and frost flowers in Kongsfjorden, Spitsbergen, *Ann.*  
869 | *Glaciol.*, 56, 69, doi: 10.3189/2015A0G69A563, 2015.

870 |  
871 | Fransson, A., Chierici, M., Skjelvan, I., Olsen, A., Assmy, P., Peterson, A. K., Ward,  
872 | B.: Effects of sea-ice and biogeochemical processes and storms on under-ice water f  
873 | CO<sub>2</sub> during the winter-spring transition in the high Arctic Ocean: Implications for sea-  
874 | air CO<sub>2</sub> fluxes, *J. Geophys. Res. Oceans*, 122(7), 5566–5587.  
875 | <https://doi.org/10.1002/2016JC012478>. 2017.

876 |  
877 | Geilfus, N.-X., Carnat, G., Papakyriakou, T., Tison, J.-L., Else, B. and co-authors:  
878 | Dynamics of pCO<sub>2</sub> and related air–ice CO<sub>2</sub> fluxes in the Arctic coastal zone (Amundsen  
879 | Gulf, Beaufort Sea), *J. Geophys. Res.*, 117, C00G10, doi:10.1029/2011JC007118, 2012.

880 |  
881 | Geilfus, N.-X., Carnat, G., Dieckmann, G. S., Halden, N., Nehrke, G., and co-authors:.  
882 | First estimates of the contribution of CaCO<sub>3</sub> precipitation to the release of CO<sub>2</sub> to the  
883 | atmosphere during young sea ice growth, *J. Geophys. Res.*, 118:244–255.  
884 | <http://dx.doi.org/10.1029/2012JC007980>, 2013.

885 |

886 | Geilfus, N.-X., Tison, J.-L., Ackley, S. F., Galley, R. J., Rysgaard, S., and co-authors:  
887 | Sea ice pCO<sub>2</sub> dynamics and air–ice CO<sub>2</sub> fluxes during the Sea Ice Mass Balance in the  
888 | Antarc-tic (SIMBA) experiment – Bellingshausen Sea, Antarctica, *The Cryosphere*, 8,  
889 | 2395–2407, doi:10.5194/tc-8-2395-2014, 2014.

890 |  
891 | Geilfus, N.-X., Galley, R. J., Crabeck, O., Papakyriakou, T., Landy, J., Tison, J.-L. and  
892 | Rysgaard, S.: Inorganic carbon dynamics of melt-pond-covered first-year sea ice in the  
893 | Canadian Arctic, *Biogeosci.*, 12, 2047–2061, doi:10.5194/bg-12-2047-2015, 2015.

894 |  
895 | Gleitz, M., Vonderlo, M. R., Tomas, D. N., Dieckmann, G. S. and Millero F. J.:  
896 | Comparison of summer and winter inorganic carbon, oxygen and nutrient  
897 | concentrations in Antarctic sea ice brine, *Mar. Chem.*, 51, 81–89, 1995.

898 |  
899 | Golden, K. M., Ackley, S. F. and Lytle, V. I.: The percolation phase transition in sea ice,  
900 | *Science*, 282, 2238–2241, 1998.

901 |  
902 | Granskog, M. A., Assmy, P., Gerland, S., Spreen, G., Steen, H., and co-authors: Arctic  
903 | research on thin ice: Consequences of Arctic sea ice loss, *Eos Transactions AGU*, 97,  
904 | 22–26, doi:10.1029/2016EO044097, 2016.

905 |  
906 | Granskog, M. A., Rösel, A., Dodd, P. A., Divine, D., Gerland, S., and co-authors: Snow  
907 | contribution to first-year and second-year Arctic sea ice mass balance north of Svalbard,  
908 | *J. Geophys. Res. Oceans*, 122, 2539-2549, doi: 10.1002/2016JC012398, 2017.

909 |  
910 | Hudson, S. R., Cohen, L., and Walden, V.: N-ICE2015 surface meteorology (Data set),  
911 | Norwegian Polar Institute, doi: 10.21334/npolar.2015.056a61d1, 2015.

912 |  
913 | Inoue, H. Y. and Ishii M.: Variations and trends of CO<sub>2</sub> in the surface seawater in the  
914 | Southern Ocean south of Australia between 1969 and 2002, *Tellus, Ser. B*, 57, 58–69,  
915 | 2005.

916 |

Mats Granskog 2018/3/23 7:04

削除:

Mats Granskog 2018/3/23 7:04

削除: www.biogeosciences.net/12/2047/2015/

919 | Jonas, T., Marty, C., and Magnusson, J.: Estimating the snow water equivalent from  
920 | snow depth measurements in the Swiss Alps, *J. Hydrol.*, 378, 161–167, 2009.

921 |  
922 | Kaleschke, L., Richter, A., Burrows, J., Afe, O., Heygster, G., and co-authors: Frost  
923 | flowers on sea ice as a source of sea salt and their influence on tropospheric halogen  
924 | chemistry, *Geophys. Res. Lett.*, 31, L16114, doi:10.1029/2004GL020655, 2004.

925 |  
926 | Kotovitch, M., Moreau, S., Zhou, J., Vancoppenolle, M., Dieckmann, G. S., and co-  
927 | authors: Air–ice carbon pathways inferred from a sea ice tank experiment, *Elementa:  
928 | Science of the Anthropocene*, 4, 1, doi10.12952/journal.elementa.000112, 2016.

929 |  
930 | Lindsay, R., and Schweiger, A.: Arctic sea ice thickness loss determined using  
931 | subsurface, aircraft, and satellite observations, *The Cryosphere*, 9(1), 269–283,  
932 | doi:10.5194/tc-9-269-2015, 2015.

933 |  
934 | Liss, P. S.: Processes of gas exchange across an air-water interface, *Deep-Sea Res.* 20,  
935 | 221–238, 1973.

936 |  
937 | [Massman, W., Sommerfeld, R., Zeller, K., Hehn, T., Hudnell, L., and Rochelle, S.: CO<sub>2</sub>](#)  
938 | [flux through a Wyoming seasonal snowpack: diffusional and pressure pumping effects,](#)  
939 | [Biogeochemistry of Seasonally Snow-Covered Catchments \(Proceedings of a Boulder](#)  
940 | [Symposium, July 1995\). IAHS Publ., 228, 71–79, 1995.](#)

941 |  
942 | Massom, R.A., Eicken, H., Haas, C., Jeffries, M. O., Drinkwater, M. R., and other co-  
943 | authors: Snow on Antarctic sea ice, *Reviews of Geophysics*, 39, 413–445, 2001.

944 |  
945 | Mehrbach, C., Culberson, C. H., Hawley, J. E., and Pytkowicz P. M.: Measurement of  
946 | the apparent dissociation constant of carbonic acid in seawater at atmospheric pressure,  
947 | *Limnol. Oceanogr.*, 18, 897–907, 1973.

948 |  
949 | Meier, W. N., Hovelsrud, G. K., van Oort, B. E. H., Key, J. R., Kovacs, K. M., and co-  
950 | authors: Arctic sea ice in transformation: A review of recent observed changes and

951 impacts on biology and human activity, *Rev. Geophys.*, 52, 185–217,  
952 doi:10.1002/2013RG000431, 2014.

953 |  
954 Miller, L. A., Papakyriakou, T. N., Collins, R. E., Deming, J. W., Ehn, J. K., and co-  
955 authors: Carbon dynamics in sea ice: A winter flux time series, *J. Geophys. Res.*, 116,  
956 C02028, doi:10.1029/2009JC006058, 2011.

957 |  
958 Miller, L. A., Fripiat, F., Else, B. G. T., Bowman, J. S., Brown, K. A., and co-authors:.  
959 Methods for Biogeochemical Studies of Sea Ice: The State of the Art, Caveats, and  
960 Recommendation, *Elementa*, 3, 000038, doi:10.12952/journal.elementa.000038, 2015.

961 |  
962 Nomura, D., Inoue, H. Y., and Toyota, T.: The effect of sea-ice growth on air–sea CO<sub>2</sub>  
963 flux in a tank experiment, *Tellus, Ser. B*, 58, 418–426, 2006.

964 |  
965 Nomura, D., Inoue, H. Y., Toyota, T., and Shirasawa, K.: Effects of snow, snowmelting  
966 and refreezing processes on air–sea-ice CO<sub>2</sub> flux, *J. Glaciol.*, 56, 196, 262–270, 2010a.

967 |  
968 Nomura, D., Eicken, H., Gradinger, R., and Shirasawa, K.: Rapid physically driven  
969 inversion of the air-sea ice CO<sub>2</sub> flux in the seasonal landfast ice off Barrow, Alaska  
970 after onset of surface melt, *Cont. Shelf Res.*, 30, 1998–2004, 2010b.

971 |  
972 Nomura, D., Granskog, M. A., Assmy, P., Simizu, D., and Hashida, G.: Arctic and  
973 Antarctic sea ice acts as a sink for atmospheric CO<sub>2</sub> during periods of snow melt and  
974 surface flooding, *J. Geophys. Res. Oceans*, 118, 6511–6524, 2013.

975 |  
976 Merkouriadi, I., Gallet, J.-C., Graham, R. M., Liston, G. E., Polashenski, C., Rösel, A.,  
977 and Gerland, S.: Winter snow conditions on Arctic sea ice north of Svalbard during the  
978 Norwegian young sea ICE (N-ICE2015) expedition, *J. Geophys. Res. Atmos.*, 122,  
979 doi:10.1002/2017JD026753, 2017.

980 |  
981 Papadimitriou, S., Kennedy, H., Norman, L., Kennedy, D. P., Dieckmann, G. S., and  
982 co-authors: The effect of biological activity, CaCO<sub>3</sub> mineral dynamics, and CO<sub>2</sub>

983 degassing in the inorganic carbon cycle in sea ice in late winter-early spring in the  
984 Weddell Sea, Antarctica, *J. Geophys. Res.* 117, C08011, doi:10.1029/2012JC008058,  
985 2012.

986 |

987 Papakyriakou, T., and Miller, L. A.: Springtime CO<sub>2</sub> exchange over seasonal sea ice in  
988 the Canadian Arctic Archipelago, *Ann. Glaciol.*, 52, 57, 215–224, 2011.

989 |

990 Parmentier, F. J. W., Christensen, T. R., Sørensen, L. L., Rysgaard, S., McGuire, A. D.,  
991 and co-authors: The impact of lower sea-ice extent on Arctic greenhouse-gas exchange,  
992 *Nature Climate Change*, 3, 195–202, doi:10.1038/nclimate1784, 2013.

993 |

994 [Petrich, C. and Eicken, H.: Growth, structure and properties of sea ice, in Thomas, D. N.](#)  
995 [and Dieckmann, G. S. eds., \*Sea Ice\*, 2nd ed., Oxford, Wiley-Blackwell, 23–77, 2010.](#)

996 |

997 Pierrot, D., Lewis, E. and Wallace, D. W. R.: MS Excel Program Developed for CO<sub>2</sub>  
998 System Calculations, ORNL/CDIAC-105a. Carbon Dioxide Information Analysis  
999 Center, Oak Ridge National Laboratory, U.S. Department of Energy, Oak Ridge,  
1000 Tennessee, doi: 10.3334/CDIAC/otg.CO2SYS\_XLS\_CDIAC105a, 2006.

1001 |

1002 Powers, D., Oneill, K., and Colbeck, S. C.: Theory of natural convection in snow, *J.*  
1003 *Geophys. Res.-Atmos.*, 90, 10641–10649, doi:10.1029/Jd090id06p10641, 1985.

1004 |

1005 Pringle, D. J., Miner, J. E., Eicken, H., and Golden, K. M.: Pore space percolation in sea  
1006 ice single crystals, *J. Geophys. Res.*, 114, C12017, doi:10.1029/2008JC005145, 2009.

1007 |

1008 Rysgaard, S., Søgaard, D. H., Cooper, M., Pucko, M., Lennert, K., and co-authors:  
1009 Ikaite crystal distribution in winter sea ice and implications for CO<sub>2</sub> system dynamics,  
1010 *The Cryosphere*, 7, 707–718, doi:10.5194/tc-7-707-2013, 2013.

1011 |

1012 [Rösel, A., Itkin, P., King, J., Divine, D., Wang, C., Granskog, M. A., Krumpen, T. and](#)  
1013 [Gerland, S.: Thin Sea Ice, Thick Snow, and Widespread Negative Freeboard Observed](#)

1014 | [During N-ICE2015 North of Svalbard, J. Geophys. Res. Oceans, 123\(2\), 1156–1176,](#)  
1015 | [doi:10.1002/2017JC012865, 2018.](#)  
1016 |  
1017 | Schindlbacher, A., Zechmeister-Boltenstern, S., Glatzel, G., and Jandl R.: Winter soil  
1018 | respiration from an Austrian mountain forest, *Agric. For. Meteorol.*, 146, 205–215,  
1019 | doi:10.1016/j.agrformet.2007.06.001, 2007.  
1020 |  
1021 | Severinghaus, J. P., Albert, M. R., Courville, Z. R., Fahnestock, M. A., Kawamura, K.,  
1022 | and co-authors: Deep air convection in the firm at a zero-accumulation site, central  
1023 | Antarctica, *Earth Planet. Sci. Lett.*, 293, 359–367, doi:10.1016/J.Epsl.2010.03.003,  
1024 | 2010.  
1025 |  
1026 | Stroeve, J. C., Serreze, M. C., Holland, M. M., Kay, J. E., Maslanik, J., and Barrett, A.  
1027 | P.: The Arctic's rapidly shrinking sea ice cover: a research synthesis, *Climatic Change*,  
1028 | 110, 1005, doi:10.1007/s10584-011-0101-1, 2012.  
1029 |  
1030 | Sørensen, L. L., Jensen, B., Glud, R. N., McGinnis, D. F., and Sejr, M. K.:  
1031 | Parameterization of atmosphere-surface exchange of CO<sub>2</sub> over sea ice, *The Cryosphere*,  
1032 | 8: 853–866. doi:10.5194/tc-8-853-2014, 2014.  
1033 |  
1034 | Takagi, K., Nomura, M., Ashiya, D., Takahashi, H., Sasa, K., and co-authors: Dynamic  
1035 | carbon dioxide exchange through snowpack by wind-driven mass transfer in a conifer-  
1036 | broadleaf mixed forest in northernmost Japan, *Global Biogeochem. Cycles*, 19, GB2012,  
1037 | doi:10.1029/2004GB002272, 2005.  
1038 |  
1039 | Toyota, T., Massom, R., Tateyama, K., Tamura, T., and Fraser, A.: Properties of snow  
1040 | overlying the sea ice off East Antarctica in late winter 2007, *Deep Sea Res. II*, 58,  
1041 | 1137–1148, 2011.  
1042 |  
1043 | Vancoppenolle, M., Meiners, K. M., Michel, C., Bopp, L., Brabant, F., and co-authors:  
1044 | Role of sea ice in global biogeochemical cycles: emerging views and challenges, *Quat.*  
1045 | *Sci. Rev.*, 79, 207–230, 2013.

Mats Granskog 2018/3/20 11:52  
**削除:** Rösel, A., Polashenski, C. M., Liston, G. E., King, J. A., Nicolaus, M. and co-authors: N-ICE2015 snow depth data with Magna Probe (Data set), Norwegian Polar Institute, doi:10.21334/npolar.2016.3d72756d, 2016a. . . [16]



1053  
1054 Weiss, R. F.: Carbon dioxide in water and seawater: the solubility of a non-ideal gas,  
1055 Mar. Chem., 2, 203–215, 1974.  
1056  
1057 Zemmeling, H. J., Delille, B., Tison, J.-L., Hintsä, E. J., Houghton, L., and co-authors:  
1058 CO<sub>2</sub> deposition over the multi-year ice of the western Weddell Sea, Geophys. Res. Lett.,  
1059 33, L13606, doi:10.1029/2006GL026320, 2006.  
1060  
1061 Zemmeling, H. J., Dacey, J. W. H., Houghton, L., Hintsä, E. J., and Liss, P. S.:  
1062 Dimethylsulfide emissions over the multi-year ice of the western Weddell Sea, Geophys.  
1063 Res. Lett., 35, L06603, doi:10.1029/2007GL031847, 2008.  
1064  
1065 Zhou, J., Delille, B., Eicken, H., Vancoppenolle, M., Brabant, F., and co-authors:  
1066 Physical and biogeochemical properties in landfast sea ice (Barrow, Alaska): Insights  
1067 on brine and gas dynamics across seasons, J. Geophys. Res. 118, 6, 3172–3189, 2013.  
1068  
1069  
1070  
1071 **Figure captions**  
1072  
1073 Figure 1. Location map of the sampling area north of Svalbard during N-ICE2015.  
1074 Image of the sea ice concentrations (a) and station map (b) were derived from Special  
1075 Sensor Microwave Imager (SSM/I) satellite data for mean of February 2015 and from  
1076 Sentinel-1 (Synthetic Aperture Radar Sensor) satellite data, respectively.  
1077  
1078 Figure 2. Photographs of the CO<sub>2</sub> flux chamber system at station YII north of Svalbard  
1079 on Friday 13 March 2015. CO<sub>2</sub> flux chamber was installed over the frost flowers on the  
1080 new thin ice in the refreezing lead.  
1081  
1082 Figure 3. Example of the temporal variation in CO<sub>2</sub> concentration ( $\Delta$ CO<sub>2</sub>) in the  
1083 chambers installed at station YII that is use to calculate the CO<sub>2</sub> flux.  $\Delta$ CO<sub>2</sub> indicates  
1084 the change in CO<sub>2</sub> concentration inside the chamber since the chamber was closed.

1085  
1086 Figure 4. Time series of air temperature measured at the weather mast over the ice floe  
1087 (10 m height) (Hudson et al., 2015). Blank period indicates no data. Colored symbols  
1088 indicate the date for the chamber flux measurements. The horizontal dashed line  
1089 indicates air temperature = 0°C.

1090  
1091 Figure 5. Vertical profiles of temperature (a) and salinity (b) in snow and sea ice (top 20  
1092 cm). The horizontal line indicates snow–ice interface. Shaded area indicates sea ice. The  
1093 triangle in (a) indicates the air temperature for each station. For stations FI7 and YI2  
1094 and 3, we have no salinity data.

1095  
1096 Figure 6. Relationships between mean air–sea ice CO<sub>2</sub> fluxes and temperature  
1097 difference between ice (T<sub>ice</sub>) and atmosphere (T<sub>a</sub>) (circle) and ice temperature (T<sub>ice</sub>)  
1098 (top 20 cm) (cross) for F<sub>snow</sub> (blue), F<sub>ff</sub> (black) and F<sub>ice</sub> (red) for young and first-year sea  
1099 ice. Relationships between mean air–sea ice CO<sub>2</sub> fluxes and the difference of pCO<sub>2</sub>  
1100 (ΔpCO<sub>2</sub><sub>b-a</sub>) between brine (pCO<sub>2</sub><sub>b</sub>) and atmosphere (pCO<sub>2</sub><sub>a</sub>) (triangle) for F<sub>snow</sub> (solid  
1101 gray) and F<sub>ice</sub> (open gray). ▼

#### 1104 Table captions

1105  
1106 Table 1. Station, date for CO<sub>2</sub> flux measurement, position, floe number, surface  
1107 condition, ice type and thickness of snow, frost flowers, and sea ice.

1108  
1109 a. Sea ice coring and snow sampling was conducted on 5 March 2015.

1110  
1111 b. Sea ice coring and snow sampling was conducted on 10 March 2015.

1112  
1113  
1114 Table 2. Station, snow density and water equivalent, brine volume fraction, and  
1115 temperature for sea ice (top 20 cm), brine temperature, salinity, DIC, TA, pCO<sub>2</sub> (pCO<sub>2</sub>  
1116 b), and atmospheric temperature, wind speed, pCO<sub>2</sub> (pCO<sub>2</sub><sub>a</sub>)<sup>a</sup> and ΔpCO<sub>2</sub><sub>b-a</sub>.

Nomura Daiki 2018/3/22 17:25

削除: 4

Nomura Daiki 2018/3/22 17:33

削除: .

... [17]

Nomura Daiki 2018/3/19 10:37

削除: and

Nomura Daiki 2018/3/19 10:37

削除: .

1122 |  
1123 | a.  $p\text{CO}_2\text{a}$  ( $\mu\text{atm}$ ) was calculated from  $\text{CO}_2$  concentration (ppmv) at Ny-Ålesund,  
1124 | Svalbard (<http://www.esrl.noaa.gov/gmd/dv/iadv/>) taking into account saturated water  
1125 | vapor and atmospheric pressure during sampling day.

1126 |  
1127 | b. Mean values for snow column.

1128 |  
1129 | c. "-" indicates no data. Due to technical reasons, data of snow, sea ice, and brine were  
1130 | not obtained.

Mats Granskog 2018/3/20 12:12  
削除: the

1131 |  
1132 |  
1133 | Table 3.  $\text{CO}_2$  flux measured over the snow ( $F_{\text{snow}}$ ), frost flowers ( $F_{\text{ff}}$ ), and ice surface  
1134 | ( $F_{\text{ice}}$ ). Values measured directly over undisturbed surfaces (either with frost flowers or  
1135 | on snow surface) at a given station are indicated in bold.

1136 |  
1137 | a. Data of first  $\text{CO}_2$  flux measurement after removal of snow or frost flowers.

1138 |  
1139 | b. "-" indicates no data.

Mats Granskog 2018/3/20 12:13  
削除: means

1140 |  
1141 | c. Number of measurements in bracket.

1142 |  
1143 | Data from station OI1 was not included.

Nomura Daiki 2018/3/19 10:57  
削除: c

Nomura Daiki 2018/3/20 9:51  
削除: c

Mats Granskog 2018/3/20 12:13  
削除: of

1 **CO<sub>2</sub> flux over young and snow-covered Arctic pack ice in**  
2 **winter and spring**

3

4 Daiki Nomura<sup>1,2,3\*</sup>, Mats A. Granskog<sup>4</sup>, Agneta Fransson<sup>4</sup>, Melissa Chierici<sup>5,6</sup>, Anna  
5 Silyakova<sup>7</sup>, Kay I. Ohshima<sup>1,3</sup>, Lana Cohen<sup>4</sup>, Bruno Delille<sup>8</sup>, Stephen R. Hudson<sup>4</sup>, and  
6 Gerhard S. Dieckmann<sup>9</sup>

7

8 1 Institute of Low Temperature Science, Hokkaido University, Kita-19, Nishi-8, Kita-  
9 ku, Sapporo, Hokkaido 060-0819, Japan.

10

11 2 Faculty of Fisheries Sciences, Hokkaido University, 3-1-1, Minato-cho, Hakodate,  
12 Hokkaido 041-8611, Japan.

13

14 3 Arctic Research Center, Hokkaido University, Kita-21, Nishi-11, Kita-ku, Sapporo,  
15 Hokkaido 001-0021, Japan.

16

17 4 Norwegian Polar Institute, Fram Centre, NO-9296 Tromsø, Norway.

18

19 5 Institute of Marine Research, NO-9294, Tromsø, Norway.

20

21 6 FRAM-High North Research Centre for Climate and the Environment, Tromsø,  
22 Norway.

23

24 7 CAGE, Centre for Arctic Gas Hydrate, Environment and Climate, Tromsø, Norway.

25

26 8 Unité d'Océanographie Chimique, Freshwater and Oceanic science Unit of research,  
27 Université de Liège, Liège, Belgium.

28

29 9 Alfred Wegener Institute for Polar and Marine Research, Bremerhaven, Germany.

30

31

32 \* Corresponding author: Daiki Nomura, e-mail: daiki.nomura@fish.hokudai.ac.jp,  
33 Faculty of Fisheries Sciences, Hokkaido University, 3-1-1, Minato-cho, Hakodate,  
34 Hokkaido 041-8611, Japan.

35

36

37

38 **Abstract**

39

40 Rare CO<sub>2</sub> flux measurements from Arctic pack ice show that two types of ice are  
41 significant contributors to the release of CO<sub>2</sub> from ice to the atmosphere during winter  
42 and spring: young thin ice with thin layer of snow, and old (several weeks) snow  
43 covered thick ice. Young thin sea ice is characterized by high salinity and then porosity  
44 and thin layer of snow. Snow covered thick ice can remain relatively warm ( $>-7.5^{\circ}\text{C}$ )  
45 due to a thick insulating snow cover despite air temperatures were as low as  $-40^{\circ}\text{C}$ .  
46 Brine volume fractions of these two ice type are therefore high enough to provide  
47 favorable conditions for gas exchange between sea ice and the atmosphere even in mid-  
48 winter. Although the potential CO<sub>2</sub> flux from sea ice decreased due to the presence of  
49 the snow, the snow surface is still a CO<sub>2</sub> source to the atmosphere for low snow density  
50 and thin snow conditions. We found that young sea ice formed in leads, without snow  
51 cover, is the most effective in terms of CO<sub>2</sub> flux ( $+1.0 \pm 0.6 \text{ mmol C m}^{-2} \text{ day}^{-1}$ ) since  
52 the fluxes are an order of magnitude higher than for snow-covered older ice ( $+0.2 \pm 0.2$   
53  $\text{mmol C m}^{-2} \text{ day}^{-1}$ ).

54

55

56

57 **1 Introduction**

58

59 Arctic sea ice is changing dramatically, with rapid declines in summer sea ice extent  
60 and a shift towards younger and thinner first-year ice rather than thick multi-year ice  
61 (e.g., Stroeve et al., 2012; Meier et al., 2014; Lindsay and Schweiger, 2015). Although  
62 the effects of sea ice formation and melting on biogeochemical cycles in the ocean have  
63 previously been discussed (e.g., Vancoppenolle et al., 2013), the effects of sea ice  
64 freezing and melting on the carbon dioxide (CO<sub>2</sub>) exchange with the atmosphere are  
65 still large unknowns (Parmentier et al., 2013).

66

67 Recent CO<sub>2</sub> flux measurements on sea ice indicate that sea ice is an active component in  
68 gas exchange between ocean and atmosphere (Nomura et al., 2013; Geilfus et al., 2013;  
69 2014; Delille et al., 2014; Brown et al., 2015; Kotovitch et al., 2016). The sea-ice CO<sub>2</sub>

70 fluxes depend on (a) the difference in the partial pressure of CO<sub>2</sub> (pCO<sub>2</sub>) between the  
71 sea ice surface and air, (b) brine volume fraction at the ice-snow interface, (c) ice  
72 surface condition including the snow deposited on ice, and (d) wind-driven pressure  
73 pumping through the snow. For (a), it is known that the air–sea ice CO<sub>2</sub> flux is driven  
74 by the differences in pCO<sub>2</sub> between the sea ice surface and atmosphere (e.g. Delille et  
75 al., 2014; Geilfus et al., 2014). The brine pCO<sub>2</sub> changes due to processes within the sea  
76 ice, such as thermodynamic process (e.g., Delille et al., 2014), biological activity (e.g.,  
77 Delille et al., 2007; Fransson et al., 2013; Rysgaard et al., 2013), and calcium carbonate  
78 (CaCO<sub>3</sub>; ikaite) formation and dissolution (e.g., Papadimitriou et al., 2012). When the  
79 pCO<sub>2</sub> in the brine is higher than that of the air pCO<sub>2</sub>, brine has the potential to release  
80 CO<sub>2</sub> to the atmosphere. Brine volume fraction (b) controls permeability of sea ice  
81 (Golden et al. 1998) and then CO<sub>2</sub> fluxes (Delille et al. 2014; Geilfus et al 2014). The  
82 air–sea ice CO<sub>2</sub> flux is strongly dependent on the sea ice surface conditions (c) (Nomura  
83 et al., 2010a, 2013; Geilfus et al., 2013; 2014; Barber et al., 2014; Brown et al., 2015;  
84 Fransson et al., 2015). Nomura et al. (2013) proposed that snow conditions (e.g., water  
85 equivalent) are important factors affecting gas exchange processes on sea ice. In  
86 addition, frost flowers promote CO<sub>2</sub> flux from the ice to the atmosphere (Geilfus et al.,  
87 2013; Barber et al., 2014; Fransson et al., 2015). For (d), it is thought that for snow  
88 cover, the CO<sub>2</sub> flux is affected by wind pumping (Massman et al., 1995; Takagi et al.,  
89 2005) in which the magnitude of CO<sub>2</sub> flux through snow or overlying soil (e.g., Takagi  
90 et al., 2005) increases due to wind pumping and can increase the transport relative to  
91 molecular diffusion by up to 40% (Bowling and Massman, 2011). These results were  
92 mainly found over land-based snow (soil and forest), and thus these processes are not  
93 well understood over sea ice (Papakyriakou and Miller, 2011).

94

95 In addition to the processes described above, the CO<sub>2</sub> flux over sea ice may also be  
96 influenced by the temperature difference between the ice surface and the atmosphere.  
97 This has been shown in previous studies in dry snowpacks over land surfaces. These  
98 studies show that there is an unstable air density gradient due to heating at the bottom  
99 producing a strong temperature difference between bottom and top of snow (e.g.,  
100 Powers et al., 1985; Severinghaus et al., 2010). This produces air flow within the  
101 snowpack, which is a potentially significant contributor to mixing and transport of gas

102 and heat within the snowpack. We expect that this process would also occur in snow  
103 over sea ice, especially during the wintertime when air temperatures are coldest and the  
104 temperature difference between sea ice surface (snow bottom) and atmosphere is largest  
105 (e.g., Massom et al., 2001). Generally, the sea ice surface under thick snow cover is  
106 warm due to the heat conduction from the bottom of sea ice and the insulation effect of  
107 the snow cover, and a strong temperature difference between sea ice surface and  
108 atmosphere is observed (e.g., Massom et al., 2001). Such a temperature difference  
109 would produce an unstable air density gradient and upward transport of air containing  
110 CO<sub>2</sub> degassed at the sea-ice surface, thereby enhancing CO<sub>2</sub> exchange between sea ice  
111 and atmosphere.

112

113 In the ice covered Arctic Ocean, storm periods, with high wind speeds and open leads  
114 are important for air-to-sea CO<sub>2</sub> fluxes (Fransson et al., 2017), due to the under-  
115 saturation of the surface waters in CO<sub>2</sub> with respect to the atmosphere. On the other  
116 hand, the subsequent ice growth and frost flowers formation in these leads promote ice-  
117 to-air CO<sub>2</sub> fluxes in winter (e.g. Barber et al., 2014). Given the fact that Arctic sea ice is  
118 shrinking and shifting from multi-year ice to first-year ice, the area of open ocean and  
119 thinner seasonal ice is increasing. Therefore, the contribution of open ocean/thinner sea  
120 ice surface to the overall CO<sub>2</sub> fluxes of the Arctic Ocean is potentially increasing.  
121 However, due to the difficulty in acquiring observations over the winter pack ice, most  
122 of the winter CO<sub>2</sub> flux measurements were examined over the Arctic landfast ice.  
123 Therefore, there is a definite lack of information on conditions during wintertime,  
124 especially from Arctic pack ice.

125

126 The Norwegian young sea ICE (N-ICE2015) campaign in winter and spring 2015  
127 provided opportunities to examine CO<sub>2</sub> fluxes between sea ice and atmosphere in a  
128 variety of snow and ice conditions in pack ice north of Svalbard. Formation of leads and  
129 their rapid refreezing allowed us to examine air–sea ice CO<sub>2</sub> fluxes over thin young sea  
130 ice, occasionally covered with frost flowers in addition to the snow-covered older ice  
131 that covers most of the pack ice area. The objectives of this study were to understand  
132 the effects of i) thin sea ice and frost flowers formations on the air–sea ice CO<sub>2</sub> flux in  
133 leads, ii) effect of snow-cover on the air–sea ice CO<sub>2</sub> flux over thin, young ice in the



134 Arctic Ocean during winter and spring seasons, and iii) of the effect of the temperature  
135 difference between sea ice and atmosphere (including snow cover) on the air–sea ice  
136 CO<sub>2</sub> flux.

137

138

## 139 **2 Materials and Methods**

140

### 141 **2.1 Study area**

142

143 This study was performed during N-ICE2015 campaign with R/V Lance in the pack ice  
144 north of Svalbard from January to June 2015 (Granskog et al., 2016). Air–sea ice CO<sub>2</sub>  
145 flux measurements were carried out from January to May 2015 during the drift of floes  
146 1, 2, and 3 of the N-ICE2015 campaign (Figures 1 and 2, Table 1). The ice pack was a  
147 mixture of young ice, first-year ice and second-year ice (Granskog et al., 2017), the two  
148 latter with a thick snow cover (Merkouriadi et al., 2017; Rösel et al., 2018). Air–sea ice  
149 CO<sub>2</sub> flux measurements were done over young ice (YI stations), first-year ice (FI  
150 stations), and old ice (multi-year ice) (OI station). In the N-ICE2015 study region modal  
151 ice thickness was about 1.3–1.5 m and modal snow thickness was about 0.5 m (Rösel et  
152 al., 2018). Formation of leads and their rapid refreezing provided us the opportunity to  
153 examine air–sea ice CO<sub>2</sub> fluxes over thin sea ice, occasionally covered with frost  
154 flowers at station YI1 (Figure 2 and Table 1). Air temperature and wind speed were  
155 measured at a 10 m weather mast on the ice floe installed about 400 m away from R/V  
156 Lance (Cohen et al., 2017).

157

158

### 159 **2.2 CO<sub>2</sub> flux measurements**

160

161 The air–sea ice CO<sub>2</sub> flux was measured with LI-COR 8100-104 chambers connected to  
162 a LI-8100A soil CO<sub>2</sub> flux system (LI-COR Inc., USA) (Figure 2). This enclosed  
163 chamber method has been widely applied over snow and sea ice (e.g., Schindlbacher et  
164 al., 2007, Geilfus et al., 2015). Two chambers were connected in a closed loop to the  
165 infrared gas analyzer (LI-8100A, LI-COR Inc., USA) to measure CO<sub>2</sub> concentration

166 through the multiplexer (LI-8150, LI-COR Inc., USA) with an air pump rate at 3 L min<sup>-1</sup>.  
167 Power was supplied by a car battery (8012-254, Optima Batteries Inc., USA). Four  
168 CO<sub>2</sub> standards (324–406 ppmv) traceable to the WMO scale (Inoue and Ishii, 2005)  
169 were prepared to calibrate the CO<sub>2</sub> gas analyzer prior to the observations. CO<sub>2</sub> flux was  
170 measured in the morning or in the afternoon during low-wind conditions (Table 2), to  
171 minimize the effect of wind on the flux (Bain et al., 2005).

172

173 One chamber was installed over undisturbed snow or frost flowers over the ice surface.  
174 The chamber collar was inserted 5 cm into the snow and 1 cm into ice at frost flowers  
175 site to avoid air leaks between inside and outside of chamber. The second chamber was  
176 installed on bulk sea ice after removing the snow or frost flowers. Flux measurements  
177 was begun immediately in order to minimize the changes of the ice surface condition. In  
178 order to evaluate the effect of removing snow on sea ice surface temperature, ice surface  
179 temperature was monitored during CO<sub>2</sub> flux measurements at station FI6. To measure  
180 the sea ice surface temperature, temperature sensor (RTR 52, T & D Corp., Japan) was  
181 installed in the top of the ice (1 cm) surface after snow removal. During first CO<sub>2</sub> flux  
182 measurements (about 30 minutes), ice surface temperature was stable at  $-5.8^{\circ}\text{C}$ ,  
183 suggesting that the effect of removing snow on the variation of sea ice surface  
184 temperature was negligible within 30 minutes. The ice surface temperature decreased  
185 from  $-5.8^{\circ}\text{C}$  to  $-8.0^{\circ}\text{C}$  at 200 minutes after removal of snow. Therefore, in this paper,  
186 the data of the initial 30 minutes of CO<sub>2</sub> flux measurement after removal of snow or  
187 frost flowers was used. The chamber was closed for 20 minutes in a sequence. The 20-  
188 minute time period was used because CO<sub>2</sub> fluxes over sea ice are much smaller than  
189 over land. The CO<sub>2</sub> concentrations within the chamber were monitored to ensure that  
190 they changed linearly throughout the measurement period (example given in Figure 3).  
191 The CO<sub>2</sub> flux ( $\text{mmol C m}^{-2} \text{ day}^{-1}$ ) (positive value indicates CO<sub>2</sub> being released from ice  
192 surface to air) was calculated based on the changes of the CO<sub>2</sub> concentration within the  
193 headspace of the chamber with LI-COR software (Model: LI8100PC Client v.3.0.1.).  
194 The mean coefficient of variation for CO<sub>2</sub> flux measurements was less than 3.0% for  
195 CO<sub>2</sub> flux values larger than  $\pm 0.1 \text{ mmol C m}^{-2} \text{ day}^{-1}$ . For CO<sub>2</sub> flux values smaller than  
196  $\pm 0.1 \text{ mmol C m}^{-2} \text{ day}^{-1}$ , the mean coefficient of variation for CO<sub>2</sub> flux measurements

197 was higher than 3.0%, suggesting that the detection limit of this system is about 0.1  
198 mmol C m<sup>-2</sup> day<sup>-1</sup>.

199

200 In this paper, we express the CO<sub>2</sub> flux measured over the snow and frost flowers as  
201 F<sub>snow</sub> and F<sub>ff</sub>, respectively, and the flux measured directly over the sea ice surface either  
202 on snow-free ice or after removal of snow and frost flowers as F<sub>ice</sub>. F<sub>snow</sub> and F<sub>ff</sub> are the  
203 natural flux (snow and frost flowers are part of the natural system), and F<sub>ice</sub> is the  
204 potential flux in cases when snow or frost flowers are removed. While removal of snow  
205 and frost flowers is an artificial situation, comparisons between F<sub>ice</sub> and F<sub>snow</sub> or F<sub>ff</sub>  
206 provide information about the effect of snow on the CO<sub>2</sub> flux. Therefore, in this study,  
207 we examine both situations for CO<sub>2</sub> flux.

208

209

### 210 **2.3 Sampling of snow, frost flowers, brine, and sea ice**

211

212 For salinity measurements, separate samples were taken for snow only, snow and frost  
213 flowers, and sea ice surface scrapes. The samples were taken using a plastic shovel,  
214 placed into plastic bags and stored in an insulated box for transport to the ship-lab for  
215 further processing. Samples were melted slowly (2–3 days) in the dark at +4°C. The  
216 temperature of the snow and frost flowers samples were measured during CO<sub>2</sub> flux  
217 measurements (approximately 60 minutes after the onset of the CO<sub>2</sub> flux measurement)  
218 using a needle-type temperature sensor (Testo 110 NTC, Brandt Instruments, Inc.,  
219 USA). The accuracy of this sensor is ±0.2°C. Snow density was obtained using a fixed  
220 volume sampler (Climate Engineering, Japan) and weight measurement. The depth of  
221 the snow pack and frost flowers was also recorded using a ruler.

222

223 Brine was also collected at stations FI3–6 for salinity, dissolved inorganic carbon (DIC)  
224 and total alkalinity (TA) measurements. Brine was collected from sackholes as  
225 described in Gleitz et al. (1995). The sackholes were drilled using a 9 cm diameter ice  
226 corer (Mark II coring system, Kovacs Enterprises, Inc., USA) to a depth of 30 cm. The  
227 sackholes were then covered with a lid of 5 cm-thick urethane to reduce heat and gas  
228 transfer between brine and atmosphere. When brine accumulated at the bottom of the

229 sackholes (approximately 15 minutes), it was collected with a plastic syringe (AS ONE  
230 Corporation, Japan) and kept in 500 mL unbreakable plastic bottles (I-Boy, AS ONE  
231 Corporation, Japan) in order to facilitate safe transport to the sampling sites in cold and  
232 harsh conditions. The brine bottles were filled without head-space and immediately  
233 stored in an insulated box to prevent freezing. Immediately after return to the ship, the  
234 brine samples were transferred to 250 mL borosilicate bottles (DURAN Group GmbH,  
235 Germany) for DIC and TA measurements using tubing to prevent contact with air. The  
236 samples were preserved with saturated mercuric chloride ( $\text{HgCl}_2$ , 60  $\mu\text{L}$  for a 250 mL  
237 sample) and stored in the dark at  $+10^\circ\text{C}$  until analyses was performed at the Institute of  
238 Marine Research, Norway.

239

240 Sea ice was collected by same ice corer as described for brine collection and at the same  
241 location as snow and frost flowers were collected. Sea ice temperature was measured by  
242 same sensor as described for snow. For the ice cores, the temperature sensor was  
243 inserted in small holes drilled into the core. The core was then cut with a stainless steel  
244 saw into 10 cm sections and stored in plastic bags for subsequent salinity measurements.  
245 The ice core sections were kept at  $+4^\circ\text{C}$  and melted in the dark prior to measurement.

246

247

## 248 **2.4 Sample analysis**

249

250 Salinities for melted snow, frost flowers, sea ice, and brine were measured with a  
251 conductivity sensor (Cond 315i, WTW GmbH, Germany). For calibration of salinity  
252 measurement, a Guildline PORTASAL salinometer Model 8410A, standardized by  
253 International Association for the Physical Sciences of the Oceans (IAPSO) standard  
254 seawater (Ocean Scientific International Ltd, UK) was used. Accuracy of this sensor  
255 was  $\pm 0.003$ .

256

257 Analytical methods for DIC and TA determination are fully described in Dickson et al.  
258 (2007). DIC in brine was determined using gas extraction of acidified sample followed  
259 by coulometric titration and photometric detection using a Versatile Instrument for the  
260 Determination of Titration carbonate (VINDTA 3C, Germany). TA of brine was

261 determined by potentiometric titration of 40 mL sample in open cell with 0.05 N  
262 hydrochloric acid using a Titrino system (Metrohm, Switzerland). The average standard  
263 deviation for DIC and TA, determined from replicate sample analyses from one sample,  
264 was within  $\pm 2 \mu\text{mol kg}^{-1}$  for both DIC and TA. Accuracy of the DIC and TA  
265 measurements were  $\pm 2 \mu\text{mol kg}^{-1}$  for both DIC and TA estimated using Certified  
266 Reference Materials (CRM, provided by A. G. Dickson, Scripps Institution of  
267 Oceanography, USA). The  $\text{pCO}_2$  of brine ( $\text{pCO}_{2\text{b}}$ ) was derived from in situ temperature,  
268 salinity, DIC and TA of brine using the carbonate speciation program CO2SYS (Pierrot  
269 et al., 2006). We used the carbonate dissociation constants ( $K_1$  and  $K_2$ ) of Mehrbach et  
270 al. (1973) as refit by Dickson and Millero (1987), and the  $\text{KSO}_4$  determined by Dickson  
271 (1990). The conditional stability constants used to derived  $\text{pCO}_2$  are strictly only valid  
272 for temperatures above 0 °C and salinities between 5 and 50. Studies in spring ice  
273 indicated that seawater thermodynamic relationships may be acceptable in warm and  
274 low-salinity sea ice (Delille et al., 2007). In sea ice brines at even moderate brine  
275 salinities of 80, Brown et al. (2014) found that measured and calculated values of the  
276  $\text{CO}_2$  system parameters can differ by as much as 40%. On the other hand, because the  
277  $\text{CO}_2$  system parameters are much more variable in sea ice than in seawater, sea ice  
278 measurements demand less precision than those in seawater. Fransson et al. (2015)  
279 performed one of few detailed analyses of the internal consistency using four sets of  
280 dissociation constants and found that the deviation between measured and calculated  
281 DIC varied between  $\pm 6$  and  $\pm 11 \mu\text{mol kg}^{-1}$ , respectively. This error in calculated DIC  
282 was considered insignificant in relation to the natural variability in sea ice.

283

284 The  $\text{pCO}_2$  of atmosphere was calculated from  $\text{CO}_2$  concentration (ppmv) at Ny-Ålesund,  
285 Svalbard (<http://www.esrl.noaa.gov/gmd/dv/iadv/>) taking into account saturated water  
286 vapor and atmospheric pressure during sampling day.

287

288 The water equivalent was computed for snow by multiplying snow thickness by snow  
289 density (Jonas et al., 2009). Brine volume of sea ice was calculated from the  
290 temperature and salinity of sea ice according to Cox and Weeks (1983) and Petrich and  
291 Eicken (2010).

292

293

## 294 **3 Results**

295

### 296 **3.1 Air temperature**

297

298 Air temperature is shown in Figure 4. During the study period, air temperature varied  
299 significantly from a low of  $-41.3^{\circ}\text{C}$  (30 January) to a high of  $+1.7^{\circ}\text{C}$  (15 June) (Hudson  
300 et al., 2015). Even in wintertime (from January to March), rapid increases of air  
301 temperature from below  $-30^{\circ}\text{C}$  up to  $-0.2^{\circ}\text{C}$  (e.g., 18 February), were observed. In  
302 springtime (from April to June), the air temperature increased continuously, and from 1  
303 June, air temperatures were near  $0^{\circ}\text{C}$ , although rapid increases (and subsequent  
304 decreases) of air temperature to near  $0^{\circ}\text{C}$  were observed on two occasions in mid-May  
305 (Cohen et al., 2017).

306

307

### 308 **3.2 Characteristics of snow, sea ice, and frost flowers**

309

310 The snow and ice thickness at the observation sites ranged between 0.0 and 60.0 cm and  
311 between 15.0 and  $>200$  cm, respectively (Table 1). The thin snow and ice represent  
312 newly formed ice in leads at station YI1. The thickness of the frost flowers ranged from  
313 1.0 to 2.5 cm.

314

315 Figure 5 shows vertical profiles of snow and ice temperature and salinity in the top 20  
316 cm of ice. Temperatures within the snowpack depended on the air temperature at the  
317 time of observation. However, the bottom of the snow and the surface of the sea ice  
318 were relatively warm ( $T > -7.5^{\circ}\text{C}$ ), except for the frost flowers station YI1 and the multi-  
319 year ice station OI1 (Figure 5a and Table 2). High salinities ( $S > 18.6$ ) characterized the  
320 bottom of the snow and the surface of the sea ice, except for the multi-year ice station  
321 OI1 (Figure 5b). At the multi-year ice station OI1, salinity was zero through the snow  
322 and top of sea ice. Salinity of frost flowers was up to 92.8 for the thin ice station YI1  
323 (Figure 5b). Snow density and water equivalent ranged from 268 to  $400\text{ kg m}^{-3}$  and 11  
324 to  $180\text{ kg m}^{-2}$ , respectively.

325

326

### 327 **3.3 Physical and chemical properties of brine**

328

329 The brine volume fraction, temperature, salinity, DIC, TA, and calculated pCO<sub>2</sub> are  
330 summarized in Table 2. Brine volume fraction in top 20 cm of ice was from 9 to 17%,  
331 except for the value of 0% at the multi-year ice station OI1 (Table 2). Brine  
332 temperatures and salinity ranged from -5.3 to -3.3°C and 51.8 to 86.6, respectively.  
333 DIC and TA of brine ranged from 3261 to 4841 μmol kg<sup>-1</sup> and 3518 to 5539 μmol kg<sup>-1</sup>,  
334 respectively. The pCO<sub>2</sub> of brine (pCO<sub>2b</sub>) (334–693 μatm) was generally higher than  
335 that of atmosphere (pCO<sub>2a</sub>) (401 ± 7 μatm), except for station FI4.

336

337

### 338 **3.4 CO<sub>2</sub> flux**

339

340 Table 3 summarizes the CO<sub>2</sub> flux measurements for each surface condition. For  
341 undisturbed natural surface conditions, i.e. measurements directly on the snow surface  
342 (F<sub>snow</sub>) or the frost flowers (F<sub>ff</sub>) on young ice, the mean CO<sub>2</sub> flux was +0.2 ± 0.2 mmol  
343 C m<sup>-2</sup> day<sup>-1</sup> for F<sub>snow</sub> and +1.0 ± 0.6 mmol C m<sup>-2</sup> day<sup>-1</sup> for F<sub>ff</sub>. The potential flux in  
344 cases when snow or frost flowers had been removed (F<sub>ice</sub>) was +2.5 ± 4.3 mmol C m<sup>-2</sup>  
345 day<sup>-1</sup>. The air–sea ice CO<sub>2</sub> fluxes measured over the ice surface (F<sub>ice</sub>) increased with  
346 increasing difference in pCO<sub>2</sub> between brine and atmosphere (ΔpCO<sub>2b-a</sub>) with  
347 significant correlation (R<sup>2</sup> = 0.9, p < 0.02), but this was not the case for F<sub>snow</sub> (R<sup>2</sup> = 0.0,  
348 p < 0.96) (Figure 6).

349

350

351

## 352 **4 Discussion**

353

### 354 **4.1 Effect of snow cover on the physical properties of sea ice surface**

355

356 In this study, we examined CO<sub>2</sub> fluxes between sea ice and atmosphere in a variety of  
357 air temperature conditions from  $-32$  to  $-3^{\circ}\text{C}$  and diverse snow and ice conditions (Table  
358 2). The bottom of the snow pack and the surface of the sea ice remained relatively warm  
359 ( $>-7.5^{\circ}\text{C}$ ) (Figure 5a, Table 2), except for stations OI1 and YI1, even though air  
360 temperature was sometimes below  $-40^{\circ}\text{C}$  (Figure 4). Relatively warm ice temperatures  
361 were likely due to the upward heat transport from the bottom of the ice and in some  
362 cases the thick insulating snow cover, except for stations OI1 and YI1 (Table 2).  
363 Therefore, snow acted as thermal insulator over sea ice, and in general the snow depths  
364 observed during N-ICE2015 point towards this being representative for first-year and  
365 second-year or older ice in the study region in winter 2015 (Rösel et al., 2018). The  
366 young and first-year ice surfaces were characterized by high salinities (Figure 5b).  
367 During sea ice formation, upward brine transport to the snow pack occurs (e.g., Toyota  
368 et al., 2011). In addition, brine within the sea ice was not completely drained as  
369 compared to that of multi-year ice. Furthermore, formation of frost flowers and  
370 subsequent wicking up of surface brine into the frost flowers also provides high salinity  
371 at the surface of sea ice (Kaleschke et al., 2004; Geilfus et al., 2013; Barber et al., 2014;  
372 Fransson et al., 2015) as observed in this study ( $S>92$ ) (Figure 5b). Snowfall over the  
373 frost flowers would have preserved the high salinity at the bottom of snow pack and top  
374 of sea ice for young and first-year ice.

375

376 As a result of the combination of the relatively high temperature and high salinity at the  
377 top of sea ice, brine volume fractions in the upper parts of the sea ice were high, up to  
378 17% (Table 2). It has been shown that ice permeability increases by an order of  
379 magnitude when brine volume fraction  $> 5\%$ , which would correspond to a temperature  
380 of  $-5^{\circ}\text{C}$  for a bulk ice salinity of 5 – the so called “law of fives” (Golden et al., 1998;  
381 Pringle et al., 2009; Zhou et al., 2013). Because sea ice temperatures were low and  
382 thereby reduced permeability in winter season, generally, air–sea ice CO<sub>2</sub> flux is at its  
383 minimum in the winter (e.g., Delille et al., 2014). However, in our study, the brine  
384 volume fractions were generally  $>9\%$ , except for station OI1 with fresh ice at the  
385 surface, providing conditions for active gas exchange within sea ice and between sea ice  
386 and atmosphere. This situation was likely made possible due to the thick snow cover  
387 and relatively thin and young sea ice.



388

389

## 390 **4.2 CO<sub>2</sub> fluxes over different sea-ice surface types**

391

392 The CO<sub>2</sub> flux measurements over different surface conditions indicate that the snow  
393 cover over sea ice affects the magnitude of air–sea ice CO<sub>2</sub> flux, especially for stations  
394 FI5 and FI6 (Table 3). For undisturbed natural surface conditions, the CO<sub>2</sub> flux  
395 measured directly over snow-covered first-year ice and young ice with frost flowers  
396 ( $F_{\text{snow}}$  and  $F_{\text{ff}}$ ) was lower in magnitude than that for potential flux obtained directly over  
397 the ice surface after removing snow ( $F_{\text{ice}}$ ), especially for stations FI5, FI6, and YI1.

398

399  $F_{\text{ff}}$  indicates that the frost flowers surface on young thin ice is a CO<sub>2</sub> source to the  
400 atmosphere and  $F_{\text{ff}}$  was higher than  $F_{\text{snow}}$ , except for station FI1. Frost flowers are  
401 known to promote gas flux, such as CO<sub>2</sub>, from the sea ice to the atmosphere (Geilfus et  
402 al., 2013; Barber et al., 2014; Fransson et al., 2015). At multi-year ice station OI1,  
403 neither snow or ice surface acted as a CO<sub>2</sub> source/sink. The surface of multi-year ice did  
404 not contain any brine (Figure 5b and Table 2), and the top of the ice was clear, colorless  
405 and very hard, suggesting superimposed formation at the top of sea ice. This situation  
406 would be similar as for freshwater-ice and superimposed-ice as these non-porous media  
407 block gas exchange effectively at the sea ice surface (Delille et al., 2014). Snow-ice and  
408 superimposed-ice were frequently found in second-year ice cores during N-ICE2015  
409 (Granskog et al., 2017), so the ‘blocking’ of gas exchange in second-year and multi-  
410 year ice may be a widespread process in the Arctic.

411

412 The magnitude of positive  $F_{\text{snow}}$  is less than  $F_{\text{ice}}$  for stations FI5 and FI6 (Table 3)  
413 indicating that the potential CO<sub>2</sub> flux from sea ice decreased due to the presence of  
414 snow. Previous studies have shown that snow accumulation over sea ice effectively  
415 impede CO<sub>2</sub> exchange (Nomura et al., 2013; Brown et al., 2015). Nomura et al. (2013)  
416 reported that 50–90% of the potential CO<sub>2</sub> flux was reduced due to the presence of  
417 snow/superimposed-ice at the water equivalent of 57–400 kg m<sup>-2</sup>, indicating that the  
418 snow properties are an important factor that controls the CO<sub>2</sub> exchange through a  
419 snowpack. Comparisons between stations FI5 and FI6 for  $F_{\text{snow}}/F_{\text{ice}}$  ratio (0.2 for FI5

420 and 0.0 for FI6) and water equivalent (11 kg m<sup>-2</sup> for FI5 and 127 kg m<sup>-2</sup> for FI6)  
421 indicate that the potential CO<sub>2</sub> flux is reduced (80% for FI5 and 98% for FI6 of the  
422 potential CO<sub>2</sub> flux) with increasing water equivalent. Although the magnitude of the  
423 potential CO<sub>2</sub> flux through the sea ice surface decreased by the presence of snow for  
424 stations FI5 and FI6 (Table 3), the snow surface still presents a CO<sub>2</sub> source to the  
425 atmosphere for low snow density and shallow depth conditions (e.g., +0.6 mmol C m<sup>-2</sup>  
426 day<sup>-1</sup> for FI5).

427

428 For F<sub>ice</sub>, there were negative CO<sub>2</sub> fluxes at stations FI3 and FI4 (-0.6 mmol C m<sup>-2</sup> day<sup>-1</sup>  
429 for FI3 and -0.8 mmol C m<sup>-2</sup> day<sup>-1</sup> for FI4) (Table 3). These fluxes corresponded to low  
430 or negative ΔpCO<sub>2 b-a</sub> as compared to that in atmosphere (Table 2 and Figure 6).  
431 Negative CO<sub>2</sub> fluxes should correspond to negative ΔpCO<sub>2 b-a</sub>. Therefore, the  
432 uncertainty for the calculation of carbonate chemistry may be one reason for the  
433 discrepancy in pCO<sub>2</sub> calculation in these conditions (Brown et al., 2014).

434

435

### 436 **4.3 Comparison to earlier studies on sea-ice to air CO<sub>2</sub> flux**

437

438 The CO<sub>2</sub> fluxes measured over the undisturbed natural surface conditions (F<sub>snow</sub> and F<sub>ff</sub>)  
439 in this study ranged from +0.1 to +1.6 mmol C m<sup>-2</sup> day<sup>-1</sup> (Table 3), which are at the  
440 lower end of the reported range based on the chamber method and eddy covariance  
441 method for natural and artificial sea ice (-259.2 to +74.3 mmol C m<sup>-2</sup> day<sup>-1</sup>)  
442 (Zemmelink et al., 2006; Nomura et al., 2006, 2010a, 2010b, 2013; Miller et al., 2011;  
443 Papakyriakou and Miller, 2011; Geilfus et al., 2012, 2013, 2014; Barber et al., 2014;  
444 Delille et al., 2014; Sørensen et al., 2014; Brown et al., 2015; Kotovitch et al., 2016).  
445 Direct comparison to previous studies is complicated because CO<sub>2</sub> flux measurements  
446 with both chamber and eddy covariance techniques were used during different condition  
447 for season and ice surface characteristics. In addition, discrepancies between chamber  
448 and eddy covariance measurements of air-ice CO<sub>2</sub> fluxes have been repeatedly observed.  
449 The footprint size of CO<sub>2</sub> exchange measured with the two approaches (Zemmelink et  
450 al., 2006, 2008; Burba et al., 2008; Amiro, 2010; Miller et al., 2011; Papakyriakou and  
451 Miller, 2011; Sørensen et al., 2014; Miller et al., 2015) may be one reason for the large

452 difference. The eddy covariance method reflects a flux integrated over a large area, that  
453 can contain several different surface types. Therefore, eddy-covariance appears to be  
454 more useful for understanding fluxes at large spatial and temporal scales. On the other  
455 hand, the chamber method reflects the area where chamber was covered, and it is useful  
456 for understanding the relationship between fluxes and ice surface conditions on smaller  
457 scales. The different spatial scales of the two methods may be therefore one reason for  
458 the discrepancy in CO<sub>2</sub> flux measurements.

459

460 Comparison of the natural CO<sub>2</sub> flux range (+0.1 to +1.6 mmol C m<sup>-2</sup> day<sup>-1</sup> for F<sub>snow</sub> and  
461 F<sub>fr</sub>) (Table 3) with previous estimates derived from the chamber method (-5.2 to +6.7  
462 mmol C m<sup>-2</sup> day<sup>-1</sup>) (Nomura et al., 2006, 2010a, 2010b, 2013; Geilfus et al., 2012,  
463 2013; 2014; Barber et al., 2014; Delille et al., 2014; Brown et al., 2015; Kotovitch et al.,  
464 2016) (these studies include both natural and potential fluxes) shows that CO<sub>2</sub> fluxes  
465 during NICE2015 experiment are at the lower end of positive values. However, our  
466 potential CO<sub>2</sub> flux (F<sub>ice</sub>) was a larger CO<sub>2</sub> source (up to +11.8 mmol C m<sup>-2</sup> day<sup>-1</sup>) than  
467 reported in previous studies (+6.7 mmol C m<sup>-2</sup> day<sup>-1</sup>). In our study, the maximum  
468 potential flux (e.g., +11.8 mmol C m<sup>-2</sup> day<sup>-1</sup>) was obtained for F<sub>ice</sub> at station FI6 (Table  
469 3). In this situation, ΔpCO<sub>2 b-a</sub> (293 μatm) was the highest (Table 2 and Figure 6), and it  
470 is reasonable to consider this as the highest magnitude of positive CO<sub>2</sub> flux within our  
471 study. However, a previous study by closed chamber method showed that even for a  
472 similar ΔpCO<sub>2 b-a</sub> (297 μatm) and magnitude for the brine volume fraction (10–15%),  
473 the CO<sub>2</sub> flux was +0.7 mmol C m<sup>-2</sup> day<sup>-1</sup> for artificial sea ice with no snow in the tank  
474 experiment (Nomura et al., 2006).

475

476 The CO<sub>2</sub> flux between the sea ice and overlying air can be expressed by the following  
477 equation,

478

$$479 F_{\text{CO}_2} = r_b k \alpha \Delta p\text{CO}_{2 \text{ b-a}},$$

480

481 where  $r_b$  is the ratio of surface of the brine channel to sea ice surface, and we assume  
482 that the value of  $r_b$  is equal to brine volume fraction,  $k$  is the gas transfer velocity,  $\alpha$   
483 is the solubility of CO<sub>2</sub> (Weiss, 1974), and  $\Delta p\text{CO}_{2 \text{ b-a}}$  is the difference in pCO<sub>2</sub> between

484 brine and atmosphere. The equation is based on the fact that CO<sub>2</sub> transfer between  
485 seawater and air is controlled by processes in the near-surface water (Liss, 1973). The  
486 gas transfer velocity ( $k$ ) calculated from  $F$ ,  $r_b$ ,  $\alpha$  and  $\Delta p\text{CO}_2_{b-a}$  was 5.12 m day<sup>-1</sup> for  $F_{ice}$   
487 at station FI6 and 0.29 m day<sup>-1</sup> for the tank experiment examined in Nomura et al.  
488 (2006). This result clearly indicates that the gas transfer velocity for  $F_{ice}$  at station FI6 is  
489 higher than that of tank experiment examined in Nomura et al. (2006) even with very  
490 similar  $\Delta p\text{CO}_2_{b-a}$  and brine volume fraction.

491

492 Here, we surmise that the gas transfer velocity and thereby CO<sub>2</sub> flux is greatly enhanced  
493 by the temperature difference between sea ice surface and atmosphere. Previous studies  
494 indicate that there is an unstable air density gradient in a dry snowpack due to basal  
495 heating and the strong temperature difference develops between bottom and top of snow  
496 (e.g., Powers et al., 1985; Severinghaus et al., 2010), which enhances the flow of air  
497 through the snowpack. We propose that the mixing and transport of gas within the  
498 snowpack could also occur over sea ice. Because temperatures at the bottom of snow  
499 and the top of sea ice were relatively warm due to a thick insulating snow over sea ice,  
500 there was a strong temperature difference between sea ice surface and atmosphere when  
501 air temperature was low (Figure 5a and Table 2). For station FI6, temperature difference  
502 between sea ice surface and atmosphere was 20.2°C after snow removal. On the other  
503 hand, in the tank experiment by Nomura et al. (2006), the temperature difference  
504 between sea ice surface (top 1.5 cm) and air in the headspace was only 4.5°C.

505

506 Figure 6 shows the relationship between mean air–sea ice CO<sub>2</sub> fluxes and temperature  
507 difference between ice and atmosphere. The strong dependence of CO<sub>2</sub> flux with  
508 temperature difference ( $T_{ice}-T_a$ ) was observed, especially for  $F_{ff}$  and  $F_{ice}$  ( $R^2 > 0.7$ ,  $p <$   
509  $0.01$ ) (Figure 6). Due to the high brine volume fractions (Table 2), sea ice surface had  
510 enough permeability for gas exchange. In addition, ice temperatures were similar for  
511 young and first-year ice (Figure 6, Table 2), indicating that  $p\text{CO}_2$  at the top of sea ice  
512 and CO<sub>2</sub> flux would be of similar order of magnitude if thermodynamic processes  
513 dominated. Therefore, our results suggest that the CO<sub>2</sub> fluxes even over the frost  
514 flowers as a natural condition, would be enhanced by the upward transport of air  
515 containing high CO<sub>2</sub> from the surface of sea ice to the atmosphere due to the strong

516 temperature difference between sea ice surface and atmosphere. Although the presence  
517 of snow on sea ice has potential to produce a larger temperature difference between sea  
518 ice surface and atmosphere and promote the upward transport, the magnitude of the CO<sub>2</sub>  
519 flux decreased due to the presence of snow. However, for young sea ice with frost  
520 flowers (e.g., station Y11), ice surface temperature was warm (Table 2), suggesting that  
521 CO<sub>2</sub> flux would be enhanced by the large temperature difference between sea ice  
522 surface and atmosphere.

523

524

525

## 526 **5 Conclusions**

527

528 We measured CO<sub>2</sub> fluxes along with sea ice and snow physical and chemical properties  
529 over first-year and young sea ice north of Svalbard in the Arctic pack ice. Our results  
530 suggest that young thin snow-free ice, with or without frost flowers, is a source of  
531 atmospheric CO<sub>2</sub> due to the high pCO<sub>2</sub> and salinity and relatively high sea ice  
532 temperature. Although the potential CO<sub>2</sub> flux from sea-ice surface decreased due to the  
533 presence of snow, snow surface still presents a modest CO<sub>2</sub> source to the atmosphere  
534 for low snow density and shallow depth situations. The highest ice to air fluxes were  
535 observed over thin young sea ice formed in leads. During N-ICE2015 the ice pack was  
536 dynamic, and formation of open water was associated with storms, where new ice was  
537 formed. The subsequent ice growth in these leads becomes important for the ice-to-air  
538 CO<sub>2</sub> fluxes in winter due to the fact that the flux from young ice is an order of  
539 magnitude larger than from snow-covered first-year and older ice.

540

541

542

## 543 **6 Data availability**

544

545 Data used in this paper will be available at Norwegian Polar Data Centre

546 (data.npolar.no).

547

548

549

550 **7 Acknowledgments**

551

552 We would like to express heartfelt thanks to the crew of R/V Lance and all members of  
553 the N-ICE2015 expedition for their support in conducting the field work. This work was  
554 supported by the Japan Society for the Promotion of Science (#15K16135, #24-4175),  
555 Research Council of Norway (KLIMAFORSK programme, grant 240639), the Centre  
556 of Ice, Climate and Ecosystems (ICE) at the Norwegian Polar Institute through the N-  
557 ICE project, the Ministry of Climate and Environment and the Ministry of Foreign  
558 Affairs of Norway and the Grant for Joint Research Program of the Institute of Low  
559 Temperature Science, Hokkaido University. AF, MC and MAG were supported by the  
560 flagship research program "Ocean acidification and ecosystem effects in Northern  
561 waters" within the FRAM-High North Research Centre for Climate and the  
562 Environment. BD is a research associate of the F.R.S-FNRS.

563

564

565

566 **Reference list**

567

568 Amiro, B.: Estimating annual carbon dioxide eddy fluxes using open-path analysers for  
569 cold forest sites. *Agr. Forest Meteorol.*, 150, 15, 1366–1372. 2010.

570

571 Bain, W. G., Hutyra, L., Patterson, D. C., Bright, A. V., Daube, B. C. Munger, J. W.,  
572 Wofsy, S. C.: Wind-induced error in the measurement of soil respiration using closed  
573 dynamic chambers. *Agricul. Forest Meteo.*, 131, 3–4, 225–232, 2005.

574

575 Barber, D. G., Ehn, J. K., Pućko, M., Rysgaard, S., Deming, J. W. and co-authors: Frost  
576 flowers on young Arctic sea ice: The climatic, chemical and microbial significance of  
577 an emerging ice type. *J Geophys. Res.-Atmos.* doi: 10.1002/2014JD021736. 2014.

578

579 Brown, K. A, Miller, L. A., Davelaar, M., Francois, R., and Tortell P. D.: Over-  
580 determination of the carbonate system in natural sea ice brine and assessment of  
581 carbonic acid dissociation constants under low temperature, high salinity conditions.  
582 *Mar. Chem* 165: 36–45. doi: 10.1016/j.marchem.2014.07.005. 2014.

583

584 Brown, K. A., Miller, L.A., Mundy, C. J., Papakyriakou, T., Francois, R., and co-  
585 authors: Inorganic carbon system dynamics in landfast Arctic sea ice during the early-  
586 melt period. *J. Geophys. Res. Oceans*, 120, 3542–3566.  
587 <http://dx.doi.org/10.1002/2014JC010620>. 2015.

588

589 Burba, G., McDermitt, D., Grelle, A., Anderson, D., and Xu, L.: Addressing the  
590 influence of instrument surface heat exchange on the measurements of CO<sub>2</sub> flux from  
591 open-path gas analyzers, *Global Change Biol.*, 14, 8, 1854–1876, 2008.

592

593 Cohen, L., Hudson, S. R., Walden, V. P., Graham, R. M., and Granskog, M. A.:  
594 Meteorological conditions in a thinner Arctic sea ice regime from winter through  
595 summer during the Norwegian young sea ICE expedition (N-ICE2015), *J. Geophys. Res.*  
596 *Atmos.*, 122, 7235–7259, doi:10.1002/2016JD026034, 2017.

597

598 Cox, G. F. N., and Weeks W. F.: Equations for determining the gas and brine volumes  
599 in sea-ice samples, *J. Glaciol.*, 29, 306–316, 1983.

600

601 Delille, B., Jourdain, B., Borges, A. V., Tison, J.-L., and Delille, D.: Biogas (CO<sub>2</sub>, O<sub>2</sub>,  
602 dimethylsulfide) dynamics in spring Antarctic fast ice, *Limnol. Oceanogr.*, 52, 1367–  
603 1379, 2007.

604

605 Delille, B., Vancoppenolle, M., Geilfus, N.-X., Tilbrook, B., Lannuzel, D., and co-  
606 authors: Southern Ocean CO<sub>2</sub> sink: the contribution of the sea ice, *J. Geophys. Res.*  
607 *Oceans*. 119 (9), 6340–6355, 2014.

608

609 Dickson, A. G., and Millero F. J.: A comparison of the equilibrium constants for the  
610 dissociation of carbonic acid in seawater media, *Deep-Sea Res.* 34, 1733–1743, 1987.

611  
612 Dickson, A. G.: Thermodynamics of the dissociation of boric acid in synthetic seawater  
613 from 273.15 to 318.15 K, *Deep-Sea Res.* 37, 755–766, 1990.  
614  
615 Dickson, A. G., Sabine, C. L., and Christian, J. R. Eds.: Guide to Best Practices for  
616 Ocean CO<sub>2</sub> Measurements, PICES Special Publication, 3, 191 pp, 2007.  
617  
618 Fransson, A., Chierici, M., Miller, L. A., Carnat, G., Thomas, H., and co-authors:  
619 Impact of sea ice processes on the carbonate system and ocean acidification state at the  
620 ice-water interface of the Amundsen Gulf, Arctic Ocean, *J. Geophys. Res.*, 118, 1–23,  
621 doi:10.1002/2013JC009164, 2013.  
622  
623 Fransson, A., Chierici, M., Abrahamsson, K., Andersson, M., Granfors, A., and co-  
624 authors: CO<sub>2</sub>-system development in young sea ice and CO<sub>2</sub> gas exchange at the ice/air  
625 interface mediated by brine and frost flowers in Kongsfjorden, Spitsbergen, *Ann.*  
626 *Glaciol.*, 56, 69, doi: 10.3189/2015A0G69A563, 2015.  
627  
628 Fransson, A., Chierici, M., Skjelvan, I., Olsen, A., Assmy, P., Peterson, A. K., Ward,  
629 B.: Effects of sea-ice and biogeochemical processes and storms on under-ice water f  
630 CO<sub>2</sub> during the winter-spring transition in the high Arctic Ocean: Implications for sea-  
631 air CO<sub>2</sub> fluxes, *J. Geophys. Res. Oceans*, 122(7), 5566–5587.  
632 <https://doi.org/10.1002/2016JC012478>. 2017.  
633  
634 Geilfus, N.-X., Carnat, G., Papakyriakou, T., Tison, J.-L., Else, B. and co-authors:  
635 Dynamics of pCO<sub>2</sub> and related air–ice CO<sub>2</sub> fluxes in the Arctic coastal zone (Amundsen  
636 Gulf, Beaufort Sea), *J. Geophys. Res.*, 117, C00G10, doi:10.1029/2011JC007118, 2012.  
637  
638 Geilfus, N.-X., Carnat, G., Dieckmann, G. S., Halden, N., Nehrke, G., and co-authors:.  
639 First estimates of the contribution of CaCO<sub>3</sub> precipitation to the release of CO<sub>2</sub> to the  
640 atmosphere during young sea ice growth, *J. Geophys. Res.*, 118:244–255.  
641 <http://dx.doi.org/10.1029/2012JC007980>, 2013.  
642



643 Geilfus, N.-X., Tison, J.-L., Ackley, S. F., Galley, R. J., Rysgaard, S., and co-authors:  
644 Sea ice pCO<sub>2</sub> dynamics and air–ice CO<sub>2</sub> fluxes during the Sea Ice Mass Balance in the  
645 Antarctic (SIMBA) experiment – Bellingshausen Sea, Antarctica, *The Cryosphere*, 8,  
646 2395–2407, doi:10.5194/tc-8-2395-2014, 2014.

647

648 Geilfus, N.-X., Galley, R. J., Crabeck, O., Papakyriakou, T., Landy, J., Tison, J.-L. and  
649 Rysgaard, S.: Inorganic carbon dynamics of melt-pond-covered first-year sea ice in the  
650 Canadian Arctic, *Biogeosci.*, 12, 2047–2061, doi:10.5194/bg-12-2047-2015, 2015.

651

652 Gleitz, M., Vonderlo, M. R., Tomas, D. N., Dieckmann, G. S. and Millero F. J.:  
653 Comparison of summer and winter inorganic carbon, oxygen and nutrient  
654 concentrations in Antarctic sea ice brine, *Mar. Chem.*, 51, 81–89, 1995.

655

656 Golden, K. M., Ackley, S. F. and Lytle, V. I.: The percolation phase transition in sea ice,  
657 *Science*, 282, 2238–2241, 1998.

658

659 Granskog, M. A., Assmy, P., Gerland, S., Spreen, G., Steen, H., and co-authors: Arctic  
660 research on thin ice: Consequences of Arctic sea ice loss, *Eos Transactions AGU*, 97,  
661 22–26, doi:10.1029/2016EO044097, 2016.

662

663 Granskog, M. A., Rösel, A., Dodd, P. A., Divine, D., Gerland, S., and co-authors: Snow  
664 contribution to first-year and second-year Arctic sea ice mass balance north of Svalbard,  
665 *J. Geophys. Res. Oceans*, 122, 2539-2549, doi: 10.1002/2016JC012398, 2017.

666

667 Hudson, S. R., Cohen, L., and Walden, V.: N-ICE2015 surface meteorology (Data set),  
668 Norwegian Polar Institute, doi: 10.21334/npolar.2015.056a61d1, 2015.

669

670 Inoue, H. Y. and Ishii M.: Variations and trends of CO<sub>2</sub> in the surface seawater in the  
671 Southern Ocean south of Australia between 1969 and 2002, *Tellus, Ser. B*, 57, 58–69,  
672 2005.

673

674 Jonas, T., Marty, C., and Magnusson, J.: Estimating the snow water equivalent from  
675 snow depth measurements in the Swiss Alps, *J. Hydrol.*, 378, 161–167, 2009.  
676

677 Kaleschke, L., Richter, A., Burrows, J., Afe, O., Heygster, G., and co-authors: Frost  
678 flowers on sea ice as a source of sea salt and their influence on tropospheric halogen  
679 chemistry, *Geophys. Res. Lett.*, 31, L16114, doi:10.1029/2004GL020655, 2004.  
680

681 Kotovitch, M., Moreau, S., Zhou, J., Vancoppenolle, M., Dieckmann, G. S., and co-  
682 authors: Air–ice carbon pathways inferred from a sea ice tank experiment, *Elementa:  
683 Science of the Anthropocene*, 4, 1, doi10.12952/journal.elementa.000112, 2016.  
684

685 Lindsay, R., and Schweiger, A.: Arctic sea ice thickness loss determined using  
686 subsurface, aircraft, and satellite observations, *The Cryosphere*, 9(1), 269–283,  
687 doi:10.5194/tc-9-269-2015, 2015.  
688

689 Liss, P. S.: Processes of gas exchange across an air-water interface, *Deep-Sea Res.* 20,  
690 221–238, 1973.  
691

692 Massman, W., Sommerfeld, R., Zeller, K., Hehn, T., Hudnell, L., and Rochelle, S.: CO<sub>2</sub>  
693 flux through a Wyoming seasonal snowpack: diffusional and pressure pumping effects,  
694 *Biogeochemistry of Seasonally Snow-Covered Catchments (Proceedings of a Boulder  
695 Symposium, July 1995)*. IAHS Publ., 228, 71–79, 1995.  
696

697 Massom, R.A., Eicken, H., Haas, C., Jeffries, M. O., Drinkwater, M. R., and other co-  
698 authors: Snow on Antarctic sea ice, *Reviews of Geophysics*, 39, 413–445, 2001.  
699

700 Mehrbach, C., Culberson, C. H., Hawley, J. E., and Pytkowicz P. M.: Measurement of  
701 the apparent dissociation constant of carbonic acid in seawater at atmospheric pressure,  
702 *Limnol. Oceanogr.*, 18, 897–907, 1973.  
703

704 Meier, W. N., Hovelsrud, G. K., van Oort, B. E. H., Key, J. R., Kovacs, K. M., and co-  
705 authors: Arctic sea ice in transformation: A review of recent observed changes and

706 impacts on biology and human activity, *Rev. Geophys.*, 52, 185–217,  
707 doi:10.1002/2013RG000431, 2014.

708

709 Miller, L. A., Papakyriakou, T. N., Collins, R. E., Deming, J. W., Ehn, J. K., and co-  
710 authors: Carbon dynamics in sea ice: A winter flux time series, *J. Geophys. Res.*, 116,  
711 C02028, doi:10.1029/2009JC006058, 2011.

712

713 Miller, L. A., Fripiat, F., Else, B. G. T., Bowman, J. S., Brown, K. A., and co-authors:.  
714 Methods for Biogeochemical Studies of Sea Ice: The State of the Art, Caveats, and  
715 Recommendation, *Elementa*, 3, 000038, doi:10.12952/journal.elementa.000038, 2015.

716

717 Nomura, D., Inoue, H. Y., and Toyota, T.: The effect of sea-ice growth on air–sea CO<sub>2</sub>  
718 flux in a tank experiment, *Tellus, Ser. B*, 58, 418–426, 2006.

719

720 Nomura, D., Inoue, H. Y., Toyota, T., and Shirasawa, K.: Effects of snow, snowmelting  
721 and refreezing processes on air–sea-ice CO<sub>2</sub> flux, *J. Glaciol.*, 56, 196, 262–270, 2010a.

722

723 Nomura, D., Eicken, H., Gradinger, R., and Shirasawa, K.: Rapid physically driven  
724 inversion of the air-sea ice CO<sub>2</sub> flux in the seasonal landfast ice off Barrow, Alaska  
725 after onset of surface melt, *Cont. Shelf Res.*, 30, 1998–2004, 2010b.

726

727 Nomura, D., Granskog, M. A., Assmy, P., Simizu, D., and Hashida, G.: Arctic and  
728 Antarctic sea ice acts as a sink for atmospheric CO<sub>2</sub> during periods of snow melt and  
729 surface flooding, *J. Geophys. Res. Oceans*, 118, 6511–6524, 2013.

730

731 Merkouriadi, I., Gallet, J.-C., Graham, R. M., Liston, G. E., Polashenski, C., Rösel, A.,  
732 and Gerland, S.: Winter snow conditions on Arctic sea ice north of Svalbard during the  
733 Norwegian young sea ICE (N-ICE2015) expedition, *J. Geophys. Res. Atmos.*, 122,  
734 doi:10.1002/2017JD026753, 2017.

735

736 Papadimitriou, S., Kennedy, H., Norman, L., Kennedy, D. P., Dieckmann, G. S., and  
737 co-authors: The effect of biological activity, CaCO<sub>3</sub> mineral dynamics, and CO<sub>2</sub>

738 degassing in the inorganic carbon cycle in sea ice in late winter-early spring in the  
739 Weddell Sea, Antarctica, *J. Geophys. Res.* 117, C08011, doi:10.1029/2012JC008058,  
740 2012.

741

742 Papakyriakou, T., and Miller, L. A.: Springtime CO<sub>2</sub> exchange over seasonal sea ice in  
743 the Canadian Arctic Archipelago, *Ann. Glaciol.*, 52, 57, 215–224, 2011.

744

745 Parmentier, F. J. W., Christensen, T. R., Sørensen, L. L., Rysgaard, S., McGuire, A. D.,  
746 and co-authors: The impact of lower sea-ice extent on Arctic greenhouse-gas exchange,  
747 *Nature Climate Change*, 3, 195–202, doi:10.1038/nclimate1784, 2013.

748

749 Petrich, C. and Eicken, H.: Growth, structure and properties of sea ice, in Thomas, D. N.  
750 and Dieckmann, G. S. eds., *Sea Ice*, 2nd ed., Oxford, Wiley-Blackwell, 23–77, 2010.

751

752 Pierrot, D., Lewis, E. and Wallace, D. W. R.: MS Excel Program Developed for CO<sub>2</sub>  
753 System Calculations, ORNL/CDIAC-105a. Carbon Dioxide Information Analysis  
754 Center, Oak Ridge National Laboratory, U.S. Department of Energy, Oak Ridge,  
755 Tennessee, doi: 10.3334/CDIAC/otg.CO2SYS\_XLS\_CDIA105a, 2006.

756

757 Powers, D., O'Neill, K., and Colbeck, S. C.: Theory of natural convection in snow, *J.*  
758 *Geophys. Res.-Atmos.*, 90, 10641–10649, doi:10.1029/Jd090id06p10641, 1985.

759

760 Pringle, D. J., Miner, J. E., Eicken, H., and Golden, K. M.: Pore space percolation in sea  
761 ice single crystals, *J. Geophys. Res.*, 114, C12017, doi:10.1029/2008JC005145, 2009.

762

763 Rysgaard, S., Søgaard, D. H., Cooper, M., Pucko, M., Lennert, K., and co-authors:  
764 Ikaite crystal distribution in winter sea ice and implications for CO<sub>2</sub> system dynamics,  
765 *The Cryosphere*, 7, 707–718, doi:10.5194/tc-7-707-2013, 2013.

766

767 Rösel, A., Itkin, P., King, J., Divine, D., Wang, C., Granskog, M. A., Krumpen, T. and  
768 Gerland, S.: Thin Sea Ice, Thick Snow, and Widespread Negative Freeboard Observed

769 During N-ICE2015 North of Svalbard, *J. Geophys. Res. Oceans*, 123(2), 1156–1176,  
770 doi:10.1002/2017JC012865, 2018.

771

772 Schindlbacher, A., Zechmeister-Boltenstern, S., Glatzel, G., and Jandl R.: Winter soil  
773 respiration from an Austrian mountain forest, *Agric. For. Meteorol.*, 146, 205–215,  
774 doi:10.1016/j.agrformet.2007.06.001, 2007.

775

776 Severinghaus, J. P., Albert, M. R., Courville, Z. R., Fahnestock, M. A., Kawamura, K.,  
777 and co-authors: Deep air convection in the firn at a zero-accumulation site, central  
778 Antarctica, *Earth Planet. Sci. Lett.*, 293, 359–367, doi:10.1016/J.Epsl.2010.03.003,  
779 2010.

780

781 Stroeve, J. C., Serreze, M. C., Holland, M. M., Kay, J. E., Maslanik, J., and Barrett, A.  
782 P.: The Arctic's rapidly shrinking sea ice cover: a research synthesis, *Climatic Change*,  
783 110, 1005, doi:10.1007/s10584-011-0101-1, 2012.

784

785 Sørensen, L. L., Jensen, B., Glud, R. N., McGinnis, D. F., and Sejr, M. K.:  
786 Parameterization of atmosphere-surface exchange of CO<sub>2</sub> over sea ice, *The Cryosphere*,  
787 8: 853–866. doi:10.5194/tc-8-853-2014, 2014.

788

789 Takagi, K., Nomura, M., Ashiya, D., Takahashi, H., Sasa, K., and co-authors: Dynamic  
790 carbon dioxide exchange through snowpack by wind-driven mass transfer in a conifer-  
791 broadleaf mixed forest in northernmost Japan, *Global Biogeochem. Cycles*, 19, GB2012,  
792 doi:10.1029/2004GB002272, 2005.

793

794 Toyota, T., Massom, R., Tateyama, K., Tamura, T., and Fraser, A.: Properties of snow  
795 overlying the sea ice off East Antarctica in late winter 2007, *Deep Sea Res. II*, 58,  
796 1137–1148, 2011.

797

798 Vancoppenolle, M., Meiners, K. M., Michel, C., Bopp, L., Brabant, F., and co-authors:  
799 Role of sea ice in global biogeochemical cycles: emerging views and challenges, *Quat.*  
800 *Sci. Rev.*, 79, 207–230, 2013.

801

802 Weiss, R. F.: Carbon dioxide in water and seawater: the solubility of a non-ideal gas,  
803 Mar. Chem., 2, 203–215, 1974.

804

805 Zemmeling, H. J., Delille, B., Tison, J.-L., Hintsa, E. J., Houghton, L., and co-authors:.  
806 CO<sub>2</sub> deposition over the multi-year ice of the western Weddell Sea, Geophys. Res. Lett.,  
807 33, L13606, doi:10.1029/2006GL026320, 2006.

808

809 Zemmeling, H. J., Dacey, J. W. H., Houghton, L., Hintsa, E. J., and Liss, P. S.:  
810 Dimethylsulfide emissions over the multi-year ice of the western Weddell Sea, Geophys.  
811 Res. Lett., 35, L06603, doi:10.1029/2007GL031847, 2008.

812

813 Zhou, J., Delille, B., Eicken, H., Vancoppenolle, M., Brabant, F., and co-authors:  
814 Physical and biogeochemical properties in landfast sea ice (Barrow, Alaska): Insights  
815 on brine and gas dynamics across seasons, J. Geophys. Res. 118, 6, 3172–3189, 2013.

816

817

818

819 **Figure captions**

820

821 Figure 1. Location map of the sampling area north of Svalbard during N-ICE2015.  
822 Image of the sea ice concentrations (a) and station map (b) were derived from Special  
823 Sensor Microwave Imager (SSM/I) satellite data for mean of February 2015 and from  
824 Sentinel-1 (Synthetic Aperture Radar Sensor) satellite data, respectively.

825

826 Figure 2. Photographs of the CO<sub>2</sub> flux chamber system at station YI1 north of Svalbard  
827 on Friday 13 March 2015. CO<sub>2</sub> flux chamber was installed over the frost flowers on the  
828 new thin ice in the refreezing lead.

829

830 Figure 3. Example of the temporal variation in CO<sub>2</sub> concentration ( $\Delta$ CO<sub>2</sub>) in the  
831 chambers installed at station YI1 that is use to calculate the CO<sub>2</sub> flux.  $\Delta$ CO<sub>2</sub> indicates  
832 the change in CO<sub>2</sub> concentration inside the chamber since the chamber was closed.

833

834 Figure 4. Time series of air temperature measured at the weather mast over the ice floe  
835 (10 m height) (Hudson et al., 2015). Blank period indicates no data. Colored symbols  
836 indicate the date for the chamber flux measurements. The horizontal dashed line  
837 indicates air temperature = 0°C.

838

839 Figure 5. Vertical profiles of temperature (a) and salinity (b) in snow and sea ice (top 20  
840 cm). The horizontal line indicates snow–ice interface. Shaded area indicates sea ice. The  
841 triangle in (a) indicates the air temperature for each station. For stations FI7 and YI2  
842 and 3, we have no salinity data.

843

844 Figure 6. Relationships between mean air–sea ice CO<sub>2</sub> fluxes and temperature  
845 difference between ice ( $T_{ice}$ ) and atmosphere ( $T_a$ ) (circle) and ice temperature ( $T_{ice}$ )  
846 (top 20 cm) (cross) for  $F_{snow}$  (blue),  $F_{ff}$  (black) and  $F_{ice}$  (red) for young and first-year sea  
847 ice. Relationships between mean air–sea ice CO<sub>2</sub> fluxes and the difference of pCO<sub>2</sub>  
848 ( $\Delta pCO_{2\ b-a}$ ) between brine (pCO<sub>2\ b</sub>) and atmosphere (pCO<sub>2\ a</sub>) (triangle) for  $F_{snow}$  (solid  
849 gray) and  $F_{ice}$  (open gray).

850

851

## 852 **Table captions**

853

854 Table 1. Station, date for CO<sub>2</sub> flux measurement, position, floe number, surface  
855 condition, ice type and thickness of snow, frost flowers, and sea ice.

856

857 a. Sea ice coring and snow sampling was conducted on 5 March 2015.

858

859 b. Sea ice coring and snow sampling was conducted on 10 March 2015.

860

861

862 Table 2. Station, snow density and water equivalent, brine volume fraction, and  
863 temperature for sea ice (top 20 cm), brine temperature, salinity, DIC, TA, pCO<sub>2</sub> (pCO<sub>2\ b</sub>)  
864 b), and atmospheric temperature, wind speed, pCO<sub>2</sub> (pCO<sub>2\ a</sub>)<sup>a</sup> and  $\Delta pCO_{2\ b-a}$ .

865

866 a.  $p\text{CO}_2\text{ a}$  ( $\mu\text{atm}$ ) was calculated from  $\text{CO}_2$  concentration (ppmv) at Ny-Ålesund,  
867 Svalbard (<http://www.esrl.noaa.gov/gmd/dv/iadv/>) taking into account saturated water  
868 vapor and atmospheric pressure during sampling day.

869

870 b. Mean values for snow column.

871

872 c. "-" indicates no data. Due to technical reasons, data of snow, sea ice, and brine were  
873 not obtained.

874

875

876 Table 3.  $\text{CO}_2$  flux measured over the snow ( $F_{\text{snow}}$ ), frost flowers ( $F_{\text{ff}}$ ), and ice surface  
877 ( $F_{\text{ice}}$ ). Values measured directly over undisturbed surfaces (either with frost flowers or  
878 on snow surface) at a given station are indicated in bold.

879

880 a. Data of first  $\text{CO}_2$  flux measurement after removal of snow or frost flowers.

881

882 b. "-" indicates no data.

883

884 c. Number of measurements in bracket.

885

886 d. Data from station OI1 was not included.



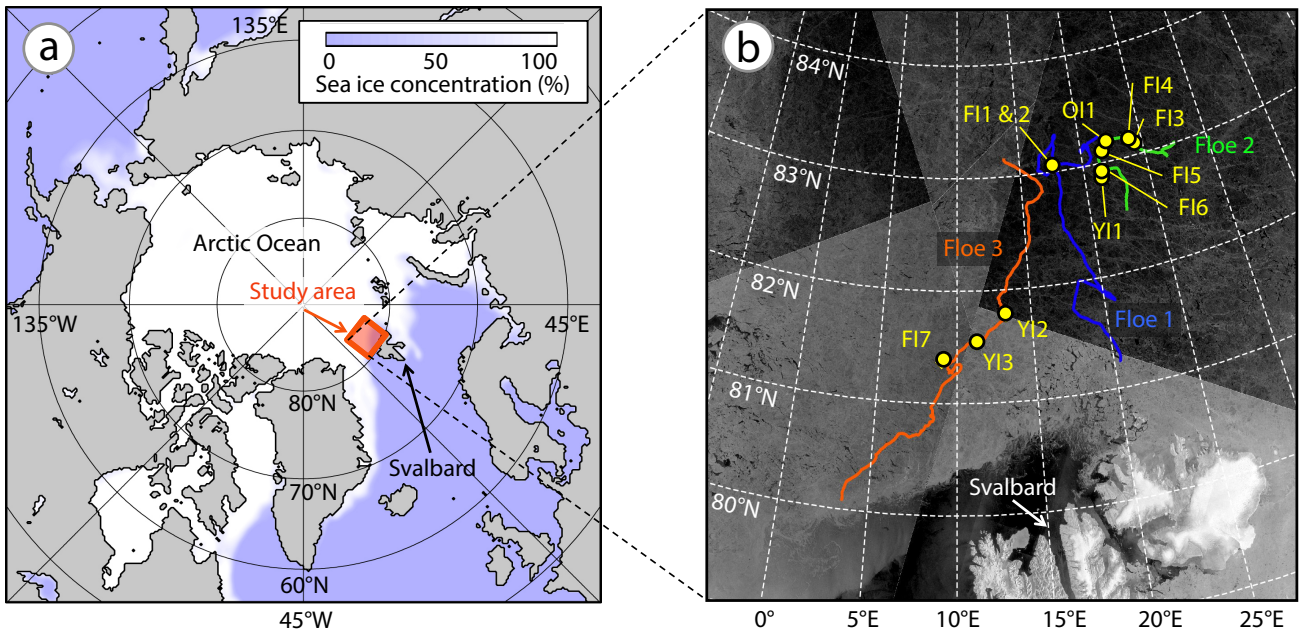

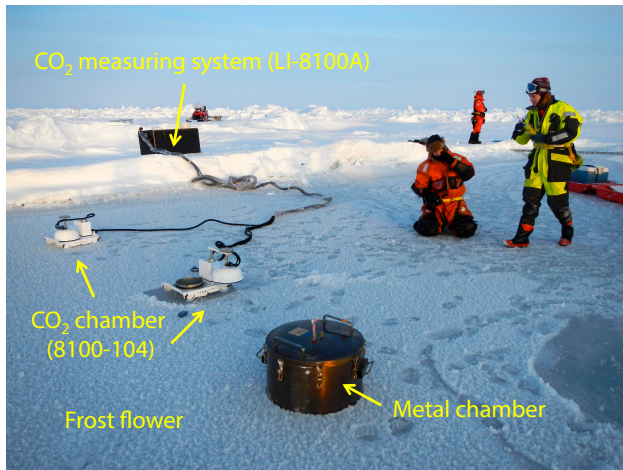

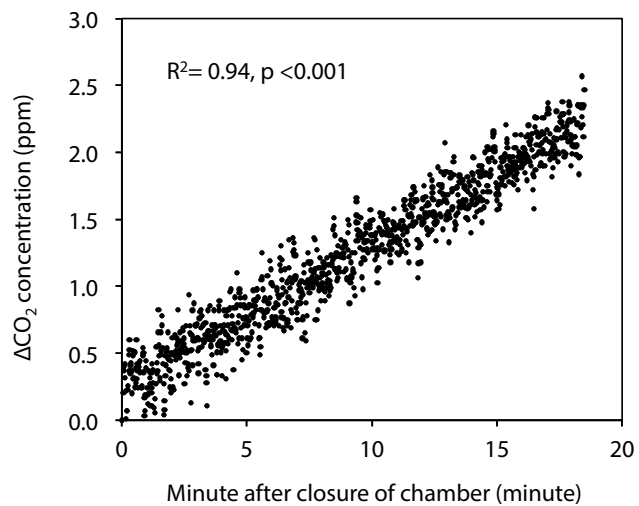

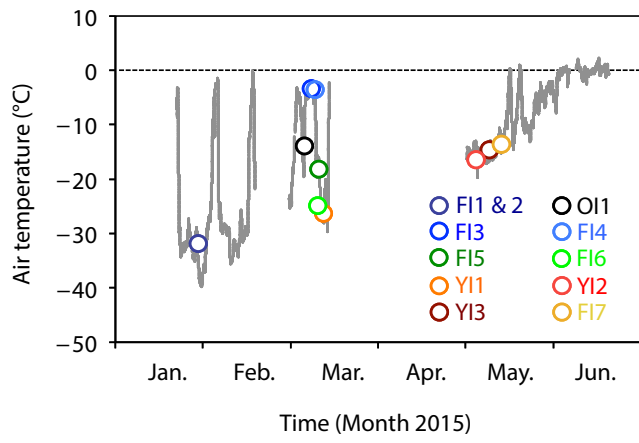

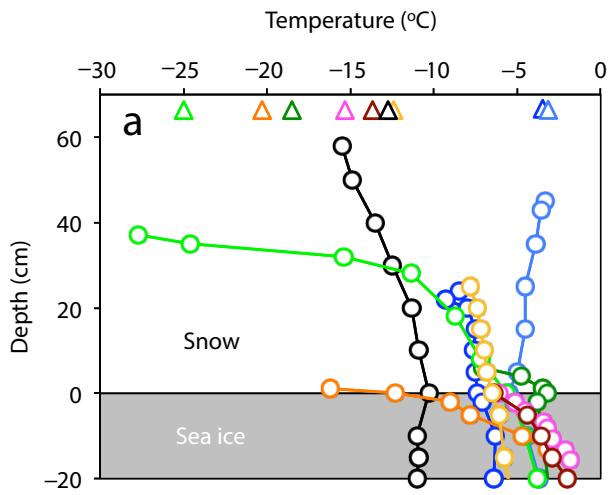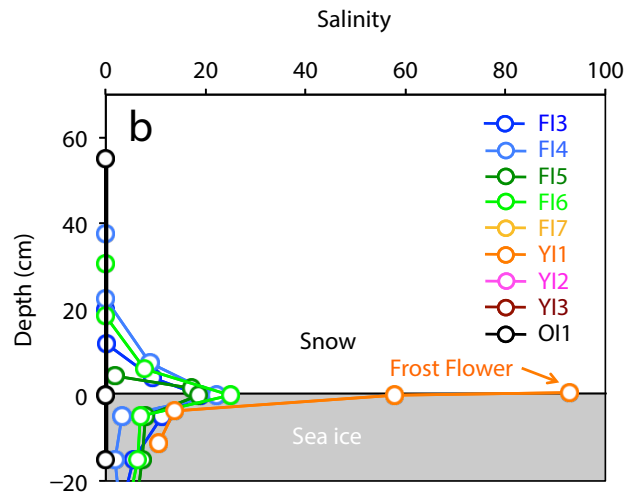

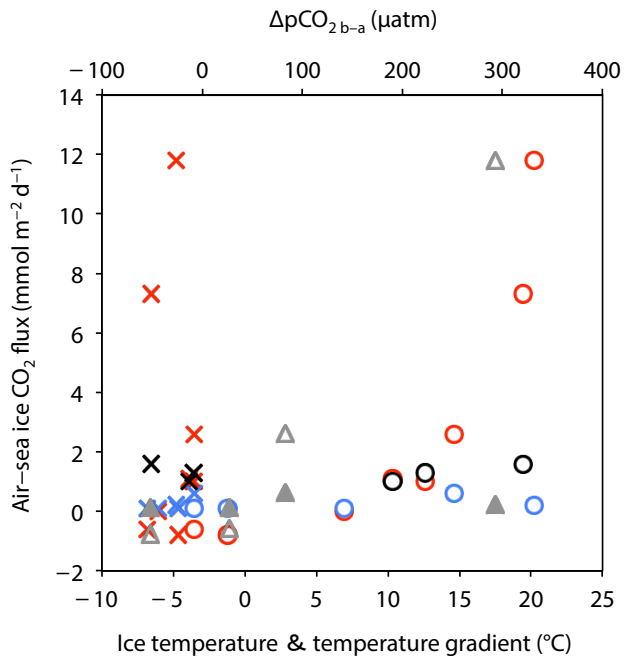

Table 1. Station, position, date for CO<sub>2</sub> flux measurement, floe number, surface condition, ice type and thickness of snow, frost flower, and sea ice.

| Station | Position             | Date of 2015                 | Floe number | Surface condition           | Ice type <sup>c</sup>    | Thickness (cm) |              |         |
|---------|----------------------|------------------------------|-------------|-----------------------------|--------------------------|----------------|--------------|---------|
|         |                      |                              |             |                             |                          | Snow           | Frost flower | Sea ice |
| FI1     | 83°03.77N, 17°34.94E | 28 January                   | 1           | Frost flower                | First-year ice           | 0.0            | 1.0          | 37.0    |
| FI2     | 83°03.77N, 17°34.94E | 28 January                   | 1           | Snow                        | First-year ice           | 8.0            | No           | 35.0    |
| FI3     | 83°08.00N, 24°09.02E | 5 and 8 March <sup>a</sup>   | 2           | Snow                        | First-year ice           | 29.0           | No           | 98.0    |
| FI4     | 83°10.56N, 22°09.42E | 9 March                      | 2           | Snow                        | First-year ice           | 36.0           | No           | 92.0    |
| FI5     | 83°06.02N, 21°38.29E | 10 and 11 March <sup>b</sup> | 2           | Snow                        | First-year ice           | 3.0            | No           | 48.0    |
| FI6     | 82°55.36N, 21°25.92E | 12 March                     | 2           | Snow                        | First-year ice           | 37.0           | No           | 69.0    |
| FI7     | 81°22.18N, 08°59.93E | 13 May                       | 3           | Snow                        | First-year ice           | 26.5           | No           | 127.0   |
| YI1     | 82°52.52N, 21°16.54E | 13 March                     | 2           | Frost flower                | Young ice                | 0.0            | 1.0          | 15.0    |
| YI2     | 81°46.53N, 13°16.00E | 5 May                        | 3           | Snow and frost flower mixed | Young ice                | 2.5            | 2.5          | 17.5    |
| YI3     | 81°32.45N, 11°17.20E | 9 May                        | 3           | Snow and frost flower mixed | Young ice                | 2.0            | 2.0          | 22.0    |
| OI1     | 83°07.18N, 24°25.59E | 6 March                      | 2           | Snow                        | Old ice (multi-year ice) | 60.0           | No           | >200    |

a. Sea ice coring, brine and snow sampling was conducted on 5 March 2015.

b. Sea ice coring, brine and snow sampling was conducted on 10 March 2015.

c. Ice type was categorized based on WMO (1970).

Table 2. Station, snow density and water equivalent, brine volume fraction and temperature for sea ice (top 20 cm), brine temperature, salinity, DIC, TA, pCO<sub>2</sub> (pCO<sub>2,b</sub>) and atmospheric temperature, wind speed, pCO<sub>2</sub> (pCO<sub>2,a</sub>)<sup>a</sup> and ΔpCO<sub>2,b-a</sub>.

| Station | Snow                                          |                                           | Sea ice (top 20 cm)          |                             | Brine               |                |                                 |                                |                              | Atmosphere          |                                         |                              |                                 |
|---------|-----------------------------------------------|-------------------------------------------|------------------------------|-----------------------------|---------------------|----------------|---------------------------------|--------------------------------|------------------------------|---------------------|-----------------------------------------|------------------------------|---------------------------------|
|         | Density <sup>b</sup><br>(kg m <sup>-3</sup> ) | Water equivalent<br>(kg m <sup>-2</sup> ) | Brine volume fraction<br>(%) | Temperature<br>(°C) (range) | Temperature<br>(°C) | Salinity       | DIC<br>(μmol kg <sup>-1</sup> ) | TA<br>(μmol kg <sup>-1</sup> ) | pCO <sub>2,b</sub><br>(μatm) | Temperature<br>(°C) | Wind speed<br>(m second <sup>-1</sup> ) | pCO <sub>2,a</sub><br>(μatm) | ΔpCO <sub>2,b-a</sub><br>(μatm) |
| F11     | — <sup>c</sup>                                | — <sup>c</sup>                            | — <sup>c</sup>               | — <sup>c</sup>              | — <sup>c</sup>      | — <sup>c</sup> | — <sup>c</sup>                  | — <sup>c</sup>                 | — <sup>c</sup>               | —31.6               | 4.0                                     | 405                          | — <sup>c</sup>                  |
| F12     | — <sup>c</sup>                                | — <sup>c</sup>                            | — <sup>c</sup>               | — <sup>c</sup>              | — <sup>c</sup>      | — <sup>c</sup> | — <sup>c</sup>                  | — <sup>c</sup>                 | — <sup>c</sup>               | —31.6               | 4.0                                     | 405                          | — <sup>c</sup>                  |
| F13     | 399                                           | 104                                       | 9                            | -6.8 (-7.4 to -6.3)         | -5.2                | 84.8           | 4628                            | 5539                           | 427                          | -3.3                | 9.0                                     | 400                          | 27                              |
| F14     | 400                                           | 180                                       | 9                            | -4.7 (-5.5 to -3.7)         | -5.3                | 86.6           | 4433                            | 5490                           | 334                          | -3.5                | 6.2                                     | 386                          | -52                             |
| F15     | 268                                           | 11                                        | 17                           | -3.5 (-3.8 to -3.1)         | -3.3                | 51.8           | 3261                            | 3518                           | 472                          | -18.1               | 6.8                                     | 389                          | 83                              |
| F16     | 343                                           | 127                                       | 13                           | -4.8 (-5.7 to -3.8)         | -4.8                | 84.0           | 4841                            | 5493                           | 693                          | -25.0               | 3.6                                     | 400                          | 293                             |
| F17     | — <sup>c</sup>                                | — <sup>c</sup>                            | — <sup>c</sup>               | -6.1 (-6.1 to -5.8)         | — <sup>c</sup>      | — <sup>c</sup> | — <sup>c</sup>                  | — <sup>c</sup>                 | — <sup>c</sup>               | -13.0               | 5.8                                     | 405                          | — <sup>c</sup>                  |
| Y11     | — <sup>c</sup>                                | — <sup>c</sup>                            | 17                           | -6.6 (-12.3 to -2.6)        | — <sup>c</sup>      | — <sup>c</sup> | — <sup>c</sup>                  | — <sup>c</sup>                 | — <sup>c</sup>               | -26.0               | 2.6                                     | 402                          | — <sup>c</sup>                  |
| Y12     | — <sup>c</sup>                                | — <sup>c</sup>                            | — <sup>c</sup>               | -3.6 (-5.1 to -1.8)         | — <sup>c</sup>      | — <sup>c</sup> | — <sup>c</sup>                  | — <sup>c</sup>                 | — <sup>c</sup>               | -16.2               | 4.5                                     | 407                          | — <sup>c</sup>                  |
| Y13     | — <sup>c</sup>                                | — <sup>c</sup>                            | — <sup>c</sup>               | -3.9 (-6.4 to -2.0)         | — <sup>c</sup>      | — <sup>c</sup> | — <sup>c</sup>                  | — <sup>c</sup>                 | — <sup>c</sup>               | -14.2               | 6.7                                     | 410                          | — <sup>c</sup>                  |
| O11     | — <sup>c</sup>                                | — <sup>c</sup>                            | 0                            | -10.8 (-11.0 to -10.9)      | — <sup>c</sup>      | — <sup>c</sup> | — <sup>c</sup>                  | — <sup>c</sup>                 | — <sup>c</sup>               | -13.5               | 4.7                                     | 397                          | — <sup>c</sup>                  |

a. pCO<sub>2,a</sub> (μatm) was calculated from CO<sub>2</sub> concentration (ppmv) at Ny-Ålesund, Svalbard (<http://www.esrl.noaa.gov/gmd/dv/iadv/>) taking into account the saturated water vapor and atmospheric pressures at sampling day.

b. Mean values for column.

c. "—" indicates no data. Due to the technical reason, data of snow, sea ice, and brine were not obtained.



Table 3. CO<sub>2</sub> flux measured over the snow (F<sub>snow</sub>), frost flowers (F<sub>ff</sub>) and ice surface (F<sub>ice</sub>).

| Station           | CO <sub>2</sub> flux (mmol C m <sup>-2</sup> day <sup>-1</sup> ) |                                       |                               |
|-------------------|------------------------------------------------------------------|---------------------------------------|-------------------------------|
|                   | Natural flux (mean ± 1SD)                                        |                                       | Potential flux                |
|                   | F <sub>snow</sub>                                                | F <sub>ff</sub>                       | F <sub>ice</sub> <sup>a</sup> |
| FI1               | – <sup>b</sup>                                                   | <b>+0.1 ± 0.1</b> (n=7) <sup>c</sup>  | – <sup>b</sup>                |
| FI2               | <b>+0.4 ± 0.3</b> (n=13) <sup>c</sup>                            | – <sup>b</sup>                        | – <sup>b</sup>                |
| FI3               | <b>+0.1 ± 0.1</b> (n=7) <sup>c</sup>                             | – <sup>b</sup>                        | –0.6                          |
| FI4               | <b>+0.1 ± 0.1</b> (n=6) <sup>c</sup>                             | – <sup>b</sup>                        | –0.8                          |
| FI5               | <b>+0.6 ± 0.3</b> (n=5) <sup>c</sup>                             | – <sup>b</sup>                        | +2.6                          |
| FI6               | <b>+0.2 ± 0.1</b> (n=5) <sup>c</sup>                             | – <sup>b</sup>                        | +11.8                         |
| FI7               | <b>+0.1 ± 0.1</b> (n=10) <sup>c</sup>                            | – <sup>b</sup>                        | ±0.0                          |
| YI1               | – <sup>b</sup>                                                   | <b>+1.6 ± 0.2</b> (n=6) <sup>c</sup>  | +7.3                          |
| YI2               | – <sup>b</sup>                                                   | <b>+1.3 ± 0.2</b> (n=9) <sup>c</sup>  | +1.0                          |
| YI3               | – <sup>b</sup>                                                   | <b>+1.0 ± 0.4</b> (n=8) <sup>c</sup>  | +1.1                          |
| OI1               | <b>+0.1 ± 0.0</b> (n=6) <sup>c</sup>                             | – <sup>b</sup>                        | +0.2                          |
| Mean <sup>d</sup> | <b>+0.2 ± 0.2</b> (n=46) <sup>c</sup>                            | <b>+1.0 ± 0.6</b> (n=30) <sup>c</sup> | +2.5 ± 4.3 (n=9) <sup>c</sup> |

a. Data of first measurement after removal of snow or frost flower.

b. "–" indicates no data.

c. Number of measurements in bracket.

d. Data of station OI1 was not included.
